1 **Microbiota and stress: a loop that impacts memory**

2 **Narjis Kraimi<sup>1‡</sup>, Flore Lormant<sup>1</sup>, Ludovic Calandreau<sup>1</sup>, Florent Kempf<sup>2</sup>, Olivier Zemb<sup>3</sup>,**  
3 **Julie Lemarchand<sup>1</sup>, Paul Constantin<sup>1</sup>, Céline Parias<sup>1</sup>, Karine Germain<sup>4</sup>, Christèle**  
4 **Dupont<sup>4</sup>, Sylvie Rabot<sup>5</sup>, Catherine Philippe<sup>5</sup>, Aline Foury<sup>6</sup>, Marie-Pierre Moisan<sup>6</sup>, Anaïs**  
5 **Vitorino Carvalho<sup>7</sup>, Vincent Coustham<sup>7</sup>, Hugues Dardente<sup>1</sup>, Philippe Velge<sup>2</sup>, Patrice**  
6 **Cousin<sup>8</sup>, Thierry Chaumeil<sup>8</sup>, Christine Leterrier<sup>1\*</sup>**

7  
8 <sup>1</sup>CNRS, IFCE, INRAE, Université de Tours, PRC, 37380, Nouzilly, France, <sup>2</sup>INRAE, ISP,  
9 Université de Tours, UMR 1282, 37380, Nouzilly, France, <sup>3</sup>INRAE-INPT-ENSAT, Université  
10 de Toulouse, GenPhySE, 31326, Castanet-Tolosan, France, <sup>4</sup>INRAE, UE1206 Systèmes  
11 d'Elevage Avicoles Alternatifs, Le Magneraud, 17700, Surgères, France, <sup>5</sup>Université Paris-  
12 Saclay, INRAE, AgroParisTech, Micalis Institute, 78350, Jouy-en-Josas, France, <sup>6</sup>INRAE,  
13 UMR 1286, Université de Bordeaux, Nutrition et Neurobiologie Intégrée, 33076, Bordeaux,  
14 France, <sup>7</sup>INRAE, BOA, Université de Tours, 37380, Nouzilly, France, <sup>8</sup>INRAE, UE Plate-  
15 Forme d'Infectiologie Expérimentale, 37380, Nouzilly, France.

16 **\*Correspondence:**

17 christine.leterrier@inrae.fr

18  
19 Key words: Microbiota-gut-brain axis, microbiota, stress, brain, memory

20  
21  
22  
23  
24  
25  
26  
27  
28  
29  
30  
31  
32  
33  
34  
35  
36  
37  
38  
39  
40  
41  
42

<sup>‡</sup>Present address: Farncombe Institute, McMaster University, Hamilton, ON, Canada

43

44 **Abstract**

45           Chronic stress and the gut microbiota appear to comprise a feed-forward loop, which  
46 contributes to the development of depressive disorders. Evidence suggests that memory can  
47 also be impaired by either chronic stress or microbiota imbalance. However, it remains to be  
48 established whether these could be a part of an integrated loop model and be responsible for  
49 memory impairments. To shed light on this, we used a two-pronged approach in Japanese quail:  
50 first stress-induced alterations in gut microbiota were characterized, then we tested whether this  
51 altered microbiota could affect brain and memory function when transferred to a germ-free host.  
52 The cecal microbiota of chronically stressed quails was found to be significantly different from  
53 that of unstressed individuals with lower  $\alpha$  and  $\beta$  diversities and increased *Bacteroidetes*  
54 abundance largely represented by the *Alistipes* genus, a well-known stress target in rodents and  
55 humans. The transfer of this altered microbiota into germ-free quails decreased their spatial and  
56 cue-based memory abilities as previously demonstrated in the stressed donors. The recipients  
57 also displayed increased anxiety-like behavior, reduced basal plasma corticosterone levels and  
58 differential gene expression in the brain. Furthermore, cecal microbiota transfer from a  
59 chronically stressed individual was sufficient to mimic the adverse impact of chronic stress on  
60 memory in recipient hosts and this action may be related to the *Alistipes* genus. Our results  
61 provide evidence of a feed-forward loop system linking the microbiota-gut-brain axis to stress  
62 and memory function and suggest that maintaining a healthy microbiota could help alleviate  
63 memory impairments linked to chronic stress.

64

65 Key words: Microbiota-gut-brain axis, memory, cognition, stress, *Alistipes*

66

67

68

69

70

71

## 72 Introduction

73 An emerging body of literature recognizes the microbiota-gut-brain axis (MGBA) as a  
74 complex and bidirectional network of interactions between the gut microbiota and the brain  
75 impacting brain health and cognitive function <sup>1,2</sup>. In the last decade, several human and animal  
76 studies have reported links between the gut microbiome and brain-related diseases like anxiety,  
77 depression or memory deficits by demonstrating major effects of gut microbiota manipulation  
78 on these disorders <sup>3-7</sup>.

79 Whether modifications in microbiota composition impact brain function remains elusive  
80 although the involvement of immune (proinflammatory cytokines), neural (spinal and vagus  
81 nerves), metabolic (short-chain fatty acids), endocrine and neurotransmitter pathways have  
82 been suggested <sup>2</sup>. A recent study <sup>8</sup> provided mechanistic evidence suggesting that stress, diet  
83 and gut microbiota generate a pathological feedforward loop that contributes to depressive  
84 disorders *via* the central endocannabinoid system. However, such a loop has not been  
85 demonstrated for other disorders that can be induced by stress, for instance cognitive alterations.  
86 Indeed, chronic stress is known to induce dysbiosis in the gut characterized by changes in  
87 gastrointestinal motility and increased intestinal permeability leading to a “leaky gut” allowing  
88 bacteria and pathogens to cross the epithelial barrier. In most cases, these changes alter gut  
89 bacterial composition modifying abundances of *Firmicutes* and *Bacteroidetes* species including  
90 a decrease in *Lactobacillus* and *Porphyromonadaceae* or an increase in *Clostridium* and  
91 *Oscillibacter* <sup>4,9</sup>.

92 Chronic stress has also well-known negative effects on memory <sup>10-15</sup>. Gut microbiota  
93 may contribute to these effects of chronic stress on memory <sup>16</sup>. For example, Li et al. (2009)  
94 showed an improvement in spatial memory abilities, measured using the hole-board apparatus,  
95 in mice with dietary-induced shifts in bacteria diversity <sup>17</sup>. A high-fat diet also led to alterations  
96 in gut microbiota composition and memory impairments in mice subjected to the Morris water  
97 maze test or the fear conditioning test <sup>18,19</sup>. In addition, comparisons between specific pathogen-  
98 free mice and germ-free mice significantly helped to highlight the link between the MGBA and  
99 memory. Gareau et al. <sup>20</sup> demonstrated in 2011, a lack of memory in germ-free mice in the T-  
100 maze test and novel object test in situations with or without stress. In 2018, Lu and his  
101 colleagues <sup>21</sup> also showed significant deficits of memory in germ-free mice, which supports the  
102 important role of the microbiota in memory development. More recently an inoculation of  
103 germ-free mice with *Lactobacillus* species has also been suggested to improve short-term  
104 memory in the passive avoidance memory test <sup>22</sup>. Indeed, many studies have provided evidence

105 of the positive effects of *Lactobacillus* and *Bifidobacterium* probiotic supplementation on  
106 memory capacities in mice using the Y-maze and Barnes maze tests, object recognition test, or  
107 fear conditioning test<sup>23–25</sup>, but also in rats in the Morris water maze and object recognition tests  
108<sup>26–28</sup> and in human volunteers with several memory questionnaires<sup>29</sup>. The interplay between  
109 gut microbiota and memory has also been demonstrated in the nonalcoholic fatty liver disease  
110 which is characterized by hepatic fat accumulation and is associated with central obesity and  
111 diabetes since probiotics can mitigate disturbances in spatial working memory and animal  
112 recognition that are encountered in such a syndrome<sup>30</sup>. Conversely, administration of  
113 antibiotics induces deleterious effects on memory as shown in mice subjected to the social  
114 transmission of food preference test and novel object recognition test<sup>1,31</sup>.

115         Although the links between chronic stress and memory and gut microbiota and memory  
116 have been demonstrated, the question still remains as to whether or not chronic stress could  
117 induce memory impairments *via* gut microbiota changes alone. The aim of the present study  
118 was to provide evidence of a feed-forward loop system linking the MGBA to stress and memory  
119 function showing that a chronic stress state induces gut dysbiosis which in turn may affect the  
120 brain and memory function. Japanese quails were used because we have already shown that  
121 their anxiety-like behavior and memory properties are impacted by a chronic stress procedure  
122 (unpredictable repeated negative stimuli for 21 days)<sup>32,33</sup> and gut microbiota manipulations  
123 (germ-free model, microbiota transfer and probiotic supplementation)<sup>34–37</sup>. Moreover, Japanese  
124 quail have recently been suggested as a relevant model to study the involvement of gut  
125 microbiota in stress processes<sup>38</sup>. Here, the approach of cecal microbiota transfer (CMT) was  
126 used involving the transfer of microbiota from a chronically-stressed individual to germ-free  
127 naïve quails to investigate whether the CMT induced any negative consequences on quails'  
128 spatial and cue-based memory abilities as previously demonstrated in the stressed donors<sup>32</sup>.  
129 Additional analysis of plasma corticosterone levels, short-chain fatty acid activity, KEGG  
130 (Kyoto Encyclopedia of Genes and Genomes) pathway predictions of microbiome and gene  
131 expression in the brain were carried out to reveal a stress loop linking the gut microbiota to  
132 memory function.

133  
134  
135  
136  
137

## 138 **Results**

139

### 140 **Stress-induced alterations in gut microbiota composition are** 141 **transferred via cecal microbiota transfer**

142 We first analysed the effects of the chronic stress procedure on the composition of  
143 quails' cecal microbiota. A total of 415 OTUs were found among the samples. Higher alpha  
144 diversities were observed in the unstressed quails (Shannon index:  $3.54 \pm 0.12$  and  $3.11 \pm 0.07$   
145 for the unstressed and stressed quails respectively; Inverse Simpson index:  $14.23 \pm 2.38$  and  
146  $6.74 \pm 0.52$  for the unstressed and stressed quails respectively, **Figure 1a**). Furthermore,  
147 differential abundance assessed at the phylum level revealed higher relative abundances of the  
148 *Firmicutes* in the unstressed quails ( $p < 0.01$ ) and of the *Bacteroidetes* in the stressed quails ( $p$   
149  $< 0.05$ ) (**Figure 2a**). At the genus level, differential abundance was observed for only one  
150 genus, *Alistipes* sp. ( $p < 0.05$ ; **Figure 2b**), out of the 69 observed in our dataset. This genus was  
151 mainly represented by the OTU1 (85.5% of the sequences assigned to *Alistipes* sp. with  $> 99\%$   
152 identity) found to be more abundant in the stressed quails (relative abundances:  $35.2\% \pm 2.0\%$   
153 and  $0.7\% \pm 0.5\%$  respectively in the stressed and unstressed quails).

154

155 After CMT into germ-free naïve quails, we compared cecal microbiota composition of  
156 germ-free recipients colonized with the cecal microbiota of a quail randomly picked either from  
157 a group of unstressed quails (CONTROL-T group) or from a group of stressed quails (STRESS-  
158 T group).

159 Cecal contents collected at Day 14 showed differences in the relative abundance of the  
160 major phyla between STRESS-T and CONTROL-T groups. Therefore, firstly we assessed  
161 overall differences using diversity indexes which revealed a higher cecal microbial diversity  
162 for the CONTROL-T quails (Shannon index:  $3.94 \pm 0.05$  vs  $2.65 \pm 0.10$ ,  $p < 0.001$  for the  
163 CONTROL-T and STRESS-T quails respectively,  $p < 0.001$ ; Inverse Simpson index:  $26.08 \pm$   
164  $2.75$  vs.  $3.96 \pm 0.37$  for the CONTROL-T and STRESS-T quails respectively,  $p < 0.001$ ; **Figure**  
165 **1a**). The CONTROL-T and STRESS-T groups compared at OTU level using Bray-Curtis  
166 distances revealed high between-group differences and weak within-group differences ( $p <$   
167  $0.001$ , **Figure 1b**). Secondly, we observed differential abundances reflecting the cecal  
168 microbial composition already observed in the donor quails. At the phylum level, the  
169 *Firmicutes* were thus more abundant in the CONTROL-T quails ( $p < 0.001$ ), whereas the

170 *Bacteroidetes* and *Actinobacteria* were more abundant in the STRESS-T quails ( $p < 0.001$  and  
171  $p < 0.001$  respectively) (**Figure 2a**). At the genus level, differential abundances were found for  
172 40 genera, but only *Alistipes* sp. presented reasonably high relative abundances ( $> 5\%$  in mean;  
173  $p < 0.001$ ; **Figure 2b**) with higher abundance in the STRESS-T group. This genus was mainly  
174 represented by OTU1 and OTU2 (respectively 84.9% and 14.0% of the sequences assigned to  
175 *Alistipes* sp.). Thirdly, the functional diversity was inferred from the taxonomic profiling, using  
176 the PICRUST2 approach for function (i.e. E.C. numbers) and KEGG (Kyoto Encyclopedia of  
177 Genes and Genomes) pathway prediction. The results indicated an average NSTI score of  $0.23$   
178  $\pm 0.06$  for the 415 OTUs, showing that the predictions were poorly supported for a fraction of  
179 the OTUs. However, the NSTI scores were respectively 0.12 and 0.11 for the two OTUs  
180 involved in the main differences between the STRESS-T and CONTROL-T groups, OTU1 and  
181 OTU2. We found 300 enriched KEGG pathways; among them, 78 pathways presented  
182 significant differences between STRESS-T and CONTROL-T groups (**Figure 1c**;  
183 **Supplementary table 1**). In particular, we observed that the microbiota from STRESS-T had  
184 a reduction in tryptophan synthesis (EC:4.2.1.20) while its catalysis was enriched compared to  
185 CONTROL-T (EC:4.1.99.1; **Figure 1d**), mainly through the *Alistipes* genus which represent  
186 15/26 of the species having tryptophanase.

187 The cecal contents collected at Day 36 showed few differences between STRESS-T and  
188 CONTROL-T groups. The levels of alpha diversities were lower than those observed at Day 14  
189 and were similar between the CONTROL-T and STRESS-T groups (Shannon index:  $3.04 \pm$   
190  $0.15$  vs  $3.11 \pm 0.12$ ,  $p > 0.10$  for the CONTROL-T and STRESS-T quails respectively; Inverse  
191 Simpson index:  $6.77 \pm 1.19$  vs.  $6.91 \pm 1.06$  for the CONTROL-T and STRESS-T quails  
192 respectively,  $p > 0.10$ ; **Figure 1a**). The Bray-Curtis distances revealed qualitative differences  
193 between the groups ( $p < 0.001$ ; **Figure 1b**). However, we did not observe significant alterations  
194 in differential abundances at the phylum level (**Figure 2a**) and only one genus presented  
195 differential abundances and a reasonably high abundance (5.0 %). This category included all  
196 uncertain genera assigned to the *Lachnospiraceae* family ( $> 5\%$  in mean;  $p < 0.001$ ; **Figure**  
197 **2b**). In line with this, functional predictions revealed only a few differences between the  
198 CONTROL-T and STRESS-T group at Day 36, including two pathways associated with  
199 tetrapyrrole biosynthesis (PWY-5189 and PWY-5188; **Figure 1c**) and seven functions mainly  
200 associated with these pathways.

201  
202

203           **Cecal microbiota transfer from stressed quails to germ-free naïve**  
204           **quails results in increased anxiety-like behavior and impaired spatial**  
205           **and cue-based memory**

206           In a novel environment test, quails from the STRESS-T group spent significantly more  
207 time on average in the wall zone, corresponding to where they were introduced and which  
208 indicated a fear-induced reduction of exploration (**Figure 3a**).

209           Fear of novelty was also investigated using a test that involved introducing a novel  
210 object (red plastic ball). The quails that fled far from the object were twice as numerous in the  
211 STRESS-T group as in the CONTROL-T group (**Figure 3b**).

212           In the open-field test, quails of the STRESS-T group traveled significantly shorter  
213 distances than those of the CONTROL-T group (**Figure 3c**), which indicates a state of enhanced  
214 stress.

215           When separated from their congeners by a wall in the social separation test, the STRESS  
216 group individuals entered significantly more into this wall zone (**Figure 3d**) which reveals  
217 increased locomotor activity in this zone, indicating higher anxiety-like behavior in this  
218 situation of social isolation.

219  
220           In the memory testing, quails were individually habituated to the test arena  
221 (**Supplementary figure d**) and trained in the spatial learning task before the tests. During the  
222 4 days of training, the quails of both groups learned to find the rewarded cup without treatment  
223 effect on the latency to visit the rewarded cup and the number of cups visited before reaching  
224 the rewarded cup. Latency to visit the rewarded cup decreased over time independently of the  
225 treatment (day effect:  $\chi^2 = 24.29$ ,  $p < 0.0001$ ; treatment effect:  $\chi^2 = 0.78$ ,  $p = 0.38$ ; interaction  
226 day\*treatment:  $\chi^2 = 0.58$ ,  $p = 0.44$ , **Figure 4a**) and the number of cups visited before reaching  
227 the rewarded cup also decreased without treatment effect (day effect:  $\chi^2 = 7.11$ ,  $p < 0.01$ ;  
228 treatment effect:  $\chi^2 = 0.18$ ,  $p = 0.67$ ; interaction day\*treatment:  $\chi^2 = 0.36$ ,  $p = 0.54$ , **Figure 4b**).  
229 After training, a test to evaluate spatial memory was performed. During this test, all the cups  
230 were unrewarded and quails had to find the previously rewarded cup - at an unchanged location  
231 - using only spatial information since all cups had a white cover. This test revealed spatial  
232 memory was impaired in the STRESS-T group compared to the CONTROL-T group. Quails of  
233 the STRESS-T group tended to take more time (**Figure 4c**) and visited significantly more cups  
234 before reaching the location of the previously rewarded cup (**Figure 4d**).

235

236 During the cued test, all the cups were unrewarded, the location of the cued cup was  
237 modified and we measured whether the individuals looked for the location of the cup usually  
238 rewarded (spatial memory) or for the cue that was associated with the reward during training  
239 (cue-based memory; black cover). Quails of the STRESS-T group took significantly more time  
240 (**Figure 4e**) and tended to make more visits than CONTROL-T quails before reaching the cued  
241 cup (**Figure 4f**).

242  
243

### 244 **Microbiota transplantation influences corticosterone levels in the** 245 **plasma, SCFA concentration in the feces and gene mRNA expression** 246 **in the brain**

247 We assessed the impact of CMT on plasma corticosterone levels of recipient quails both  
248 before and after acute stress. Plasma corticosterone levels at baseline were significantly lower  
249 in the STRESS-T group than in the CONTROL-T group (**Figure 3e**). The magnitude of the  
250 increase in corticosterone after contention (level induced by stress of contention minus basal  
251 level) tended to be higher in STRESS-T quails than in CONTROL-T quails ( $6.02 \pm 1.9$  vs  $-1.7$   
252  $\pm 2.8$ ,  $\chi^2 = 3.54$ ,  $p = 0.07$ ) and the plasma corticosterone levels obtained after 10 min of restraint  
253 stress were not significantly different between the two groups ( $8.7 \pm 0.9$  for CONTROL-T  
254 group vs  $11.3 \pm 2.5$  for STRESS-T group,  $\chi^2 = 0.05$ ,  $p > 0.10$ ).

255 The fermentation activity of the gut microbiota was measured through the quantitative  
256 analysis of SCFA contained in fecal contents at Day 6 and Day 20 after CMT. Fecal samples at  
257 Day 6 revealed significantly higher concentrations in the CONTROL-T group for caproate,  
258 isovalerate and isocaproate (**Supplementary table 2**). No significant differences in SCFA  
259 composition were found at Day 20.

260 Finally, we assessed CMT effects on gene expression in the hippocampus, the  
261 arcopallium and the hypothalamus, which are brain structures involved in cognitive processing,  
262 control of fear behavior and regulation of the HPA axis, respectively. In the hippocampus,  
263 *CRHR1* expression was significantly lower in quails of the STRESS-T group (**Figure 5a**). No  
264 significant differences were found in the arcopallium (**Figure 5b**). The expression of *CRHR1*  
265 and *PCNA* were significantly reduced in the hypothalamus of the STRESS-T group compared  
266 to the CONTROL-T group (**Figure 5c**).



## 267 Discussion

268           Chronic stress is not only recognized to have a major impact on gut physiology and  
269 microbiota composition<sup>4,9</sup> but it is also known to be an important risk factor for brain-related  
270 dysfunctions such as memory impairments<sup>10–15</sup>. Moreover, Chevalier and collaborators<sup>8</sup>  
271 recently showed that chronic stress and the gut microbiota generate a feedforward loop that  
272 contributes to depressive disorders. In the present research, we investigated whether a similar  
273 loop system could exist between gut microbiota and memory deficits associated with chronic  
274 stress conditions. Using Japanese quails raised in a unique microbial controlled-environment  
275 inside isolators, we demonstrated that germ-free host quails receiving cecal microbiota from a  
276 donor quail subjected to chronic stress showed clear impairments in memory and also increased  
277 anxiety-like behavior when compared to germ-free quails implanted with cecal microbiota from  
278 unstressed quail. To induce chronic stress in quails we used a procedure of unpredictable  
279 negative stimulations, which has been thoroughly validated in this line of Japanese quail<sup>39–42</sup>.  
280 Although this procedure has profound impacts on behavior and physiology, its potential impact  
281 on gut microbiota has not been investigated to date.

282           The composition of cecal microbiota of quails subjected to the chronic stress procedure  
283 differed from that of unstressed quails. The main differences related to one OTU assigned to  
284 the *Alistipes* genus (OTU 1; more abundant in stressed quails), which belongs to the  
285 *Bacteroidetes* phylum, known to be altered by various forms of stress, including exposure to  
286 early-life maternal separation stress<sup>43</sup>, social stress<sup>44</sup> and water-avoidance stress<sup>45</sup>. *Alistipes*  
287 sp. is a genus already known to be favored by various kinds of induced stress in different  
288 models. This includes models in which mice were subjected to a water immersion restraint  
289 stress<sup>46</sup> or mice housed on a grid floor and stressed by this rearing condition<sup>47</sup>. Interestingly,  
290 increased abundance of *Alistipes* sp. has also been found in the gut microbiota of depressive  
291 human patients<sup>48,49</sup> and in anorexia nervosa<sup>50</sup>.

292           The oral inoculation of the modified microbiota in recipient quails resulted in a higher  
293 anxiety level than in quails inoculated with the microbiota from unstressed quail. The rigorous  
294 use of germ-free chicks and controlled conditions in isolators demonstrates that individuals of  
295 the STRESS-T group were more anxious as they displayed an overall decrease in exploration  
296 in the novel environment test and the open-field test and increased activity during social  
297 isolation. This increase in anxiety-like behavior mimics the one reported in quails subjected to  
298 the chronic stress procedure<sup>40,51</sup>. The higher anxiety-like behavior of STRESS-T quails in  
299 response to novelty was confirmed by the novel object test during which the quails escaped

300 twice as much in the STRESS-T group compared to the CONTROL-T group. Again, this result  
301 is in line with the increased neophobia described in chronic stress quails<sup>41,52</sup> and further  
302 strengthens the implication of gut microbiota in neophobia responses that we recently  
303 characterized in this quail line<sup>34</sup>.

304 Our study showed that colonization with the cecal microbiota from a stressed individual affects  
305 spatial memory and cue-based memory. During the training session, the quails of both groups  
306 learned the task similarly, which allows us to interpret the test responses in terms of specific  
307 memory capacity with no bias of motivation, vision ability or learning.

308 Spatial memory, which consists in relating positions of visual cues in the environment, is  
309 indeed a privileged target of chronic stress in mammals and also in birds<sup>53,54</sup>. Unlike spatial  
310 memory, which is a form of explicit memory, cue-based memory is an implicit memory system  
311 based on a simple cue-response association<sup>55,56</sup>. Previous studies have shown correlations  
312 between modifications of the gut microbiota and impaired memory performances<sup>16</sup>. However,  
313 no study has established a causal link between the alterations in gut microbiota induced by  
314 chronic stress and memory deficits. The CMT protocol we used enables us to demonstrate for  
315 the first time the causal role of the gut microbiota in stress-induced memory impairments by  
316 showing that an altered gut microbiota alone is able to induce the negative effects of chronic  
317 stress on spatial and cue-based memory (**Figure 6**). This pivotal result is in line with a recent  
318 study that showed that a transfer of gut microbiota from old mice to young mice was sufficient  
319 to reproduce the cognitive decline associated with aging<sup>57</sup> and suggests that memory  
320 impairments are mediated by gut microbiota in many cases. The results of the CMT protocol  
321 provide evidence of a feed-forward loop system linking the microbiota-gut-brain axis to stress  
322 and memory function (**Figure 6**). This evidence suggests that future research should target gut  
323 microbiota composition and not only neurobiological pathways to prevent stress-induced  
324 memory alterations.

325 Furthermore, our data revealed differential regulation of several genes in the brain  
326 according to the cecal microbiota used for colonization. In the hippocampus and the  
327 hypothalamus, colonization with the cecal microbiota from a stressed individual reduced  
328 *CRHRI* expression and the level of plasma corticosterone. *CRHRI* is an essential regulator of  
329 the HPA axis; its hippocampal expression has also been shown to be reduced by maternal  
330 separation in mice<sup>58</sup> and *CRHRI*-deficient mice are unable to mount a corticosterone response  
331 to stress<sup>59</sup>. Moreover, this reduction in plasma corticosterone levels under basal conditions has  
332 previously been described in European starling<sup>60,61</sup> and in this line of quail subjected to a  
333 chronic stress procedure<sup>40</sup>, whereas more acute stress increases corticosterone levels in this

334 species<sup>38</sup>. We found reduced *PCNA* expression in the hypothalamus of the STRESS-T group,  
335 which suggests decreased cell proliferation. We also noted that in the STRESS-T group *BDNF*  
336 expression tended to reduce or increase in the hypothalamus and arcopallium respectively,  
337 suggesting changes in brain plasticity mechanisms. However, we did not detect any significant  
338 differences in mRNA expression levels in any of the three brain structures for the nuclear  
339 receptors *GR* and *MR* involved in the negative feedback of the HPA axis.

340 We looked at the cecal microbiota composition to understand more clearly whether  
341 microbiota transfer can modulate anxiety-like behavior and memory performance. As expected,  
342 the cecal microbiota transfer also led to different cecal microbiota composition in the recipient  
343 quails which can explain the behavioral, cognitive and physiological differences observed. At  
344 Day 14, cecal contents of STRESS-T quails showed lower microbial alpha diversity, a lower  
345 abundance of *Firmicutes* and a higher abundance of *Actinobacteria* and *Bacteroidetes* than  
346 cecal contents of CONTROL-T quails. Interestingly, these results are very similar to those  
347 observed in stressed or unstressed donors, which suggests successful microbiota transfer. In  
348 addition, the greatest differences in OTUs between the two groups were assigned to the *Alistipes*  
349 genus with higher abundance in the STRESS-T than CONTROL group. As previously  
350 mentioned, the *Alistipes* genus has already been linked to stress and depression in mice and  
351 humans<sup>46-48</sup> and could perhaps serve as a biomarker of stress. An increasing body of literature  
352 supports different explanations for the mechanisms by which *Alistipes* could play a role in the  
353 MGBA<sup>62</sup>. Detrimental effects of *Alistipes* would be related to the permeability of the gut  
354 induced by microbial dysbiosis which allows molecules such as lipopolysaccharides (LPS) to  
355 enter into the bloodstream leading to neuroinflammation and behavioral alterations. The  
356 resulting inflammatory cytokine production in the central nervous system impairs the synthesis  
357 of neuropeptides associated with brain-related disorders, including depression<sup>63</sup>. The  
358 explanation that best fits our results and our microbiome functional analysis is that of the  
359 tryptophan amino acid (Trp) pathway and the serotonergic system since *Alistipes* species are  
360 indole-positive and possess the tryptophanase enzyme which directly produces indole from Trp  
361 and may lead to a disruption of the serotonergic balance in the host<sup>62,64,65</sup>. Since the link  
362 between the serotonergic system and HPA axis is well-recognized now<sup>66</sup>, the alterations of  
363 behavior and HPA axis activity found in our study could be explained by the high abundance  
364 of *Alistipes* species and their action on the Trp pathway. In addition, our results on the  
365 tryptophanase function in the gut microbiota are in line with several studies showing a link  
366 between Trp metabolism in the gut and behavioral changes during chronic stress<sup>67-69</sup>. These  
367 findings in *Alistipes* make this bacterial genus an important candidate in the interaction between

368 the gut microbiota and the stress system and corroborate the implication of microbial Trp  
369 metabolism in behavioral and neurological stress-induced changes.

370 The fermentation activity of the gut microbiota assessed through the quantitative  
371 analysis of the SCFA contained in fecal contents showed higher concentrations of caproate,  
372 isocaproate and isovalerate, but lower proportions of acetate in CONTROL-T quails. Together,  
373 these data showed that CONTROL-T and STRESS-T quails had different gut microbiota  
374 fermentation activities, which strongly supports the involvement of SCFA in the microbiota-  
375 gut-brain communication in vertebrates <sup>70-72</sup> and is in line with recent results showing that  
376 microbiota changes induced by chronic stress affect lipid metabolism and the generation of  
377 endocannabinoids <sup>8</sup>.

378 At the end of the experiment after 36 days, there were fewer differences in cecal  
379 microbiota between STRESS-T and CONTROL-T groups. This could reflect an age effect and  
380 an evolution of the cecal microbiota with time or a change of environment during the memory  
381 test procedure. However, both groups still showed differences in terms of anxiety-like behavior,  
382 cognition and gene expression in brain structures. This may imply that there is a critical period  
383 in early life during which the initially implanted microbiota would have irreversible  
384 consequences on cerebral, behavioral and cognitive development even after re-colonization  
385 with a different microbiota. This hypothesis is supported by several rodent studies and would  
386 imply that a critical period may exist in all vertebrates <sup>73,74</sup>. These long-term effects of the  
387 microbiota suggest that the origin of certain cognitive disorders should not only be investigated  
388 in the gut microbiota present at the time of the onset of the disorders, but also in previous  
389 intestinal changes. Interestingly, studies aimed at investigating a potential correlation between  
390 autism spectrum disorders and antibiotic treatments received at a young age revealed an  
391 imbalance in the composition of the gut microbiota <sup>75</sup>. This suggests that the prevention of  
392 memory alterations due to stress must target an immediate return to a state of equilibrium in the  
393 composition of the microbiota in order to avoid possible long-term effects.

394

395

396

## 397 **Conclusions**

398 In conclusion, we showed that gut microbiota alone is sufficient to mimic stress effects  
399 on cognition and impair memory abilities. These data substantiate the existence of a stress loop

400 connecting the gut to memory development that implicates the gut microbiota as a component  
401 that has to be considered in greater depth in future studies on stress processes. Interestingly, our  
402 findings add more evidence to the role of *Alistipes* genus as a potential biomarker of stress in  
403 vertebrates because of its link with the tryptophan metabolism pathway. These data suggest that  
404 maintaining a healthy microbiota could help alleviate memory impairments linked to chronic  
405 stress.

## 406 **Materials and Methods**

407 All the animal care procedures were carried out in accordance with the guidelines set by  
408 the European Community's Council Directive (DIRECTIVE 2010/63/UE) and with French  
409 legislation on animal research. The protocol was approved by the French Ministry of education,  
410 higher education and research (Ministère de l'Éducation Nationale, de l'Enseignement  
411 Supérieur et de la Recherche) under the protocol N° APAFIS# 201707131037724.V3 - 10607.  
412 The principles of reduction, replacement and refinement were implemented in all the  
413 experiments. We used a line genetically selected for its long tonic immobility duration and  
414 therefore a high level of emotional reactivity (E+) <sup>76</sup>. Emotional reactivity is characterized by  
415 behavioral and physiological responses to a challenging situation <sup>77</sup>.

416

417 The timing plan of the experiment is summarized in the **Supplementary figure a**.

### 418 **Chronic mild stress procedure in donors and microbiota sample** 419 **collection**

420 The quail chicks used to provide the stressed and unstressed donors were hatched on the  
421 farm of the Experimental Poultry Facility (UE PEAT, INRAE, 2018. DOI:  
422 10.15454/1.5572326250887292E12). At 15th day of age, male quails were divided in two  
423 groups, i.e. unstressed and stressed groups. From the age of 17 to 40 days, quails from the  
424 stressed group were exposed to unpredictable repeated negative stimuli (confinement in a  
425 corner of the home cage, disturbances in the home cage, cage shaking, noises, crowding, novel  
426 environment, transport) four times per day and once per night while quails from the unstressed  
427 group were just visited by a human four times per day according to the procedure described by  
428 Favreau-Peigné et al. <sup>32,33</sup>. Each negative stimulus lasted 30 min, continuously or not. Negative  
429 stimuli and visits occurred at random times and a given stimulus was never used twice per day  
430 in order to increase unpredictability and decrease animal habituation to the stress procedure.

431 Cecal contents were collected from 4 adult males of the E+ line which had previously  
432 been subjected to the chronic stress procedure described <sup>32,33</sup> during both night and day for 21  
433 days (stressed quails) and from 4 adult males of the same line which had not been stressed  
434 (unstressed quails). Both groups of quails aged 6 weeks old were housed under the same  
435 conditions and fed the same diet. For cecal content collection, both ceca were opened. Their  
436 contents were gently removed to obtain only the contents and not the mucosa and then mixed  
437 in 500  $\mu$ L of sterile glycerol + cysteine. All the cecal contents were collected in a clean room  
438 with autoclaved tools under a sterile biological safety cabinet and were then stored at  $-80^{\circ}\text{C}$ .

439

## 440 **Production of germ-free quail recipients**

441 The eggs were collected every 90 min from females from the same line reared under  
442 conventional conditions and that were not exposed to any stress procedure. The eggs were  
443 disinfected following the procedure previously described <sup>34</sup> in the facilities of the PFIE, INRA,  
444 2018 (Infectiology of Farm, Model and Wild Animals Facility,  
445 <https://doi.org/10.15454/1.5572352821559333E12>). Briefly, eggs were disinfected with  
446 potassium permanganate (10 g) and a solution of formalin + milliQ water for 90 min and in  
447 Divosan-plus (Diversey France SAS) 1.5% for 1 min before incubation for 14 days. After a  
448 third disinfection with a spray of Divosan 1.5% for 30 s, eggs were rinsed with autoclaved water  
449 for 16.5 min.

## 450 **Animals and housing**

451 Disinfected eggs were placed in sterile isolators in the facilities of the PFIE and germ-  
452 free chicks hatched in the following days. Control for germ-free status was performed through  
453 anaerobic and aerobic culture of freshly voided fecal samples (in resazurin thioglycolate, serum  
454 enriched BHI and blood agar and incubated at  $25^{\circ}\text{C}$  and  $35^{\circ}\text{C}$ ). Two days after hatching (Day  
455 2), the chicks were transferred to the breeding room which housed six large sterile isolators of  
456 identical dimensions and organization (**Supplementary figure b**; see Kraimi et al. <sup>34</sup>). Using  
457 the Polymerase Chain Reaction (PCR) method on down feathers for sexing Japanese quail at  
458 hatching <sup>78</sup>, 6 females and 6 males were kept in each isolator for the experiment. All quails were  
459 given free access to  $\gamma$ -irradiated (45kGy, Scientific Animal Food and Engineering, Augy,  
460 France) feed pellets (metabolizable energy: 12.2 MJ; Crude Protein: 204 g/kg) and autoclaved  
461 water. The temperature in the isolators was set at  $40\text{-}38^{\circ}\text{C}$  the first days and was gradually

462 reduced to 28°C at 14 days of age. The light phase was 24 hours until Day 4 and this was  
463 progressively reduced by 1 hour per day until reaching a minimum of 10 hours of light per day  
464 after 18 days. The living environment of the chicks in the isolators was enriched by wood  
465 shaving dust baths and by placing previously sterilized new objects (plastic or glass balls) on  
466 successive days. In order to avoid mating in the isolator and excessive stocking density, female  
467 quails were eliminated at Day 14 and only males were conserved for plasma corticosterone  
468 assays and memory tests.

## 469 **Bacterial inoculation**

470 On the day of transfer to the isolators (Day 2), we colonized the chicks of three of the  
471 isolators (group STRESS-T) with the cecal microbiota from a unique donor male randomly  
472 chosen from the stressed quails. This was done to maintain a balanced ecosystem. The chicks  
473 from the three other isolators (group CONTROL-T) were colonized with the cecal microbiota  
474 from another donor male randomly chosen from the unstressed quails. For each group, the cecal  
475 content was thawed and diluted aerobically in 12 mL of sterile physiological saline. Each chick  
476 was colonized by oral gavage with 100 µL of this microbiota suspension.

477 The cecal contents of recipient females at Day 14 and recipient males at Day 36 were  
478 also collected for analysis of microbiota composition following the same procedure as described  
479 above.

## 480 **Microbiota composition analysis**

### 481 **Microbial DNA extraction and 16S rRNA gene amplification**

482 Microbial DNA extraction was performed using the QIAamp DNA mini-kit (ref  
483 #51306, Qiagen Inc., Courtaboeuf, France) following the procedure previously described<sup>36</sup>.  
484 Briefly, 25 mg of thawed digestive content were mixed in 1 mL of lysis buffer and homogenized  
485 at maximum speed (frequency 30.sec<sup>-1</sup>) with 0.4 g of sterile zirconium beads in a tissuelyser  
486 mixer Retsch MM400 for 3 min, followed by heating at 70°C for 15 min. After a centrifugation  
487 at 16 000 g and 4°C for 5 min, the supernatant was conserved at ambient temperature and 300  
488 µL lysis buffer were added. The homogenization steps were repeated on the pellet and followed  
489 by a second centrifugation (5 min, 16 000 g, 4°C). The two supernatants were pooled and  
490 homogenized for the DNA purification and filtration step. Proteinase K and AL buffer were  
491 added to the supernatants and the mix was heated at 70°C for 10 min to remove proteins. The  
492 sample was transferred to a tube containing pure ethanol for a purification step using a QIAamp

493 column as described by the manufacturer. The sample was then eluted in buffer AE (10 mM  
494 Tris-Cl; 0.5 mM EDTA; pH 9.0; Qiagen Inc., Courtaboeuf, France). DNA purity was assessed  
495 with a NanoDrop spectrophotometer based on the 260/280 and 260/230 O.D. ratios.

496 PCR amplification of the bacterial 16S rRNA gene on DNA extracts was carried out  
497 using the primers designed to amplify from highly V4-V5 conserved regions (Forward:  
498 CTTTCCCTACACGACGCTCTTCCGATCTGTGYCAGCMGCCGCGGTA; Reverse:  
499 GGAGTTCAGACGTGTGCTCTTCCGATCTCCCCGYCAATTCMTTTRAGT). The PCR  
500 program used consisted of an initial denaturation at 94°C for 2 min followed by 30 cycles of  
501 94°C for 60 s, 65°C for 40 s, 72°C for 30 s and a final extension step of 72°C for 10 min. PCR  
502 product size was checked with 2% agarose gel electrophoresis before the sequencing step.

### 503 **16S rRNA gene sequencing**

504 V4-V5 region full length reads were obtained using Illumina Miseq 250-bp paired end  
505 reads. The resulting PCR products were purified and loaded onto the Illumina MiSeq cartridge  
506 in accordance with the manufacturer's instructions. Using PhiX control following the  
507 manufacturer instructions, the quality of the run was checked internally and with the help of the  
508 previously integrated index, each pair-end sequence was assigned to its sample. Each pair-end  
509 sequence was assembled using Flash software with at least a 10-bp overlap between the forward  
510 and reverse sequences, which allows 10% mismatch. The absence of contamination was  
511 checked with a negative control during the PCR (water as template). The corresponding  
512 sequences were uploaded on NCBI with the access number (PRJNA527873).

### 513 **Anxiety-like behavior tests**

514 Each isolator was divided into two equal areas using an opaque separating wall. One  
515 area was dedicated to rearing, containing the feed and water, while the other half was  
516 specifically used for the behavioral tests (see Kraimi et al. <sup>34</sup>). All behavioral tests were recorded  
517 with a camera fixed above each isolator.

### 518 **Novel environment test**

519 On Day 7, in order to assess the anxiety-like behavior in a novel environment we  
520 introduced the quails in groups of three (to limit the social isolation component) in the test area  
521 for the first time for 5 min and The Observer XT (version 12.5) software was used to measure  
522 for each individual the average time spent (time/number of entries) in the wall zone of the test  
523 area separated from the rearing area by an opaque wall (**Supplementary figure c**). The quails



524 were initially placed in the wall zone and the time spent in the other parts of the test area was  
525 considered as exploration activity.

### 526 **Novel object test**

527 On Day 13, we measured the behavioral reactions of quails in the presence of a novel  
528 object. Each quail was placed for 5 min in the test area in a sterilized white plastic corridor  
529 which contained a sterilized red plastic ball. The number of quails attempting to escape from  
530 the object was counted as an indication of fear.

### 531 **Open-field test**

532 After the memory tests, male quails were subjected to an open-field test outside the  
533 isolators to assess anxiety-like behavior to a novel environment. The test was carried out in a  
534 clean sterilized room. Quails were removed individually from the isolator and carried in a  
535 transport box where they were left for 5 min before the test in order to calm down and limit fear  
536 reactions linked to the removal from the isolator. The open-field device was a square arena (80  
537 cm × 80 cm × 29 cm) made of wood with a floor with a yellow waterproof plastic surface under  
538 50 lux light conditions and a camera fixed above the area. Each quail was placed in the center  
539 of the open-field and allowed to freely explore the test arena for 5 min. Using the Ethovision  
540 XT tracking software (version 7.1), we recorded the locomotor activity (total distance traveled).  
541 At the end of each test session, the quail was returned to its isolator using a transport box and  
542 the test arena was disinfected.

### 543 **Social separation test**

544 On Day 12 we measured the anxiety-like behavior of the quails during a period of  
545 separation from their congeners. This test is an adaptation of the well-known social isolation  
546 test because under our conditions, the quails could hear their congeners on the other side of the  
547 wall. The quails were individually placed in the test area for 5 min. The Ethovision XT  
548 (version 7.1) software was used to record the number of times the quail entered in the wall zone  
549 of the test area previously described (**Supplementary figure c**). This parameter represents a  
550 good indicator of the anxiety level of the quails because the more agitated a quail is in an attempt  
551 to reach its congeners reflects an increasing degree of anxiety<sup>79</sup>.

### 552 **Plasma corticosterone levels**

553 Plasma corticosterone levels of male quails were measured on Day 14 for the basal value  
554 and after a stress (restraint in a crush cage for 10 min) on Day 15. For this purpose, each quail

555 was gently removed from the isolator and transported to a quiet place with no other birds around  
556 using a transport box disinfected between each quail. Both basal and acute stress blood samples  
557 were collected by jugular puncture into a tube containing EDTA. Sampling alternated between  
558 CONTROL-T and STRESS-T group and was carried out during the first 6 h of the light phase  
559 (from 9 to 13 am) for both days. Following centrifugation at 4000 g for 10 min at 4°C, plasma  
560 samples were separated and stored at -80°C until measurement. Corticosterone was measured  
561 using a chemiluminescent immunoassay kit (Corticosterone chemiluminescent immunoassay  
562 kit, Arbor Assays, Michigan, USA). Plasma was diluted 1:100 and the measurements were  
563 performed with the mean of two replicates. The intra-assay coefficients of variation were 5.9%  
564 and 11.0% at 207.7 pg/mL and 64.37 pg/mL, respectively. The inter-assay coefficients of  
565 variation were 11.3% and 15.1% at 199.6 pg/mL and 55.6 pg/mL, respectively. The assay  
566 sensitivity was 6.71 pg/mL. Three quails of the STRESS-T group and one quail of the  
567 CONTROL-T group were removed from the analysis because of problems during sampling.

## 568 **Memory tests**

569 Memory tests were performed on males with 18 quails in the STRESS-T group and 16  
570 quails in the CONTROL-T group (two quails were eliminated from this group due to sexing  
571 error). Because of the large size of the memory test device, the entire memory part was  
572 conducted outside the isolator in clean disinfected rooms and the quails were always  
573 manipulated by the same experimenter with gloves. The behavioral parameters were scored  
574 manually directly with a camera (Sony DCR-SR58E) placed above the arena and linked to a  
575 computer.

## 576 **Familiarization to mealworms**

577 From Day 17 to Day 19, a familiarization process began with cups and mealworms. Six  
578 times per day, each quail was individually removed from the isolator and placed in a transport  
579 box with an opaque ceramic cup (6 x 7 cm) containing three live mealworms. The  
580 familiarization phase ended when the quails had eaten at least one mealworm in the cup, and  
581 the habituation phase began.

## 582 **Habituation**

583 Thirty min before each habituation session, quails were removed from the isolators in  
584 groups of three and placed in a pre-test box (one box per isolator, 50 x 40 x 30 cm, with wood  
585 shavings) without access to food in order to enhance food motivation. During the 3 days of

586 habituation, quails were individually introduced once a day into the center of an octagonal arena  
587 surrounded by walls (50 cm high). The floor was covered by yellow waterproof linoleum under  
588 20 lux light conditions in the center. The arena was surrounded by a blue curtain preventing  
589 escape attempts. Four black visual cues were placed on the curtain and 4 others on the walls of  
590 the arena. Eight opaque ceramic cups similar to those used during familiarization were placed  
591 in the arena. Four cups were covered with black paper and the other four with white paper. Each  
592 cup contained a live mealworm and the position of white and black cups were randomly moved  
593 each day of habituation and for each quail. Quails were allowed to freely explore the arena and  
594 the cups until they found and ate all the mealworms or after a maximum test duration of 600 s.  
595 The arena was disinfected after each animal session. The number of mealworms eaten from  
596 white and black cups was scored after each habituation session. The habituation phase ended  
597 when quails had eaten 6 to 8 mealworms on average per session without a significant difference  
598 in performance between the two treatments and after this the training phase started. Three quails  
599 of the STRESS-T group which did not approach the cups during the 3 days of habituation were  
600 removed from the analysis.

### 601 **Training**

602 As previously, quails were removed from the isolators 30 min before each training  
603 session, in groups of three and placed in the pre-test box without access to food in order to  
604 enhance food motivation. In the training phase, seven cups were covered with white paper and  
605 only the rewarded cup was covered with black paper (**Supplementary figure d**). The rewarded  
606 cup contained two to three live mealworms and the location of this cup remained the same  
607 throughout the whole training period. Quails underwent two training trials per day in this test  
608 design with an interval of 30 min between each trial. Finding the reward is a task which can be  
609 solved by quails by either learning that the black cup contains the reward (cue-based memory)  
610 or by learning the spatial location of the rewarded cup (spatial memory). Quails were placed in  
611 the arena at one of three different randomly distributed entry points. The trial was stopped when  
612 quails found the mealworms in the rewarded cup or after a maximum test duration of 300 s. As  
613 in the habituation phase, the arena was disinfected between each animal. Between each trial,  
614 the quail was returned to its box with its congeners and wood shavings. The latency and the  
615 number of cups visited before finding the rewarded cup were recorded for each trial. After 4  
616 consecutive days we stopped the training phase when all the quails took on average less than  
617 35 s and made fewer than 3 mistakes before reaching the black rewarded cup without a  
618 significant difference of performance between the two treatments.

619 **Probe tests**

620 The day following the last training trial, quails completed two different tests (spatial and  
621 cued test). In both of these, no mealworms were placed in the cups to avoid any olfactory cue.  
622 In the first, the spatial test, all the cups were white to assess whether quails used their spatial  
623 memory to locate the position of the rewarded cup (spatial cup). The tested quail was introduced  
624 at a different entry than the three used for the training phase and was allowed to explore the  
625 arena freely for 2 min. The latency and the number of cup visits before finding the spatial cup  
626 (used as indicator of memory errors) were recorded. In order to prevent a potential influence of  
627 one test on the other, the second test was performed 3 days after the spatial test (2 consecutive  
628 days of training between the two tests with the rewarded cup in the same location as in the first  
629 training period). This second cued test was a displacement test in which the black cup was  
630 placed in a different position from that of the training period. This test was used to determine  
631 the memory system engaged to solve the task: if a quail went first to the spatial cup from the  
632 previous test, it indicates that it used a dominant spatial strategy and if it visited the black cup  
633 (the cued cup), it indicates that a dominant cue-based strategy based on the cup color was used  
634 <sup>80</sup>. A new entry point equidistant from the spatial cup and the cued cup was used. The latency  
635 and the number of cup visits before finding the spatial or the cued cup were also recorded in  
636 this test.

637 **Gene expression in the brain**

638 **Tissue collection**

639 At Day 36, quails were decapitated post-euthanasia (administration of 0.3 mL of  
640 Vetoquinol Dolethal 182.2 mg/mL in the occipital sinus) and brains quickly removed for  
641 dissection of the hippocampus, arcopallium and hypothalamus regions according to the quail  
642 brain atlas <sup>81</sup>. All the samples were immediately deep-frozen in liquid nitrogen and then stored  
643 at -80°C until analysis.

644 **RNA extraction, reverse transcription and real-time polymerase chain  
645 reaction (qPCR)**

646 Total RNA was extracted from frozen brain tissue (hippocampus, arcopallium,  
647 hypothalamus) using Trizol Reagent (Sigma) following the manufacturer's instructions.  
648 Briefly, 1 mL of Trizol Reagent was added to each sample and homogenized, 200 µL of  
649 chloroform (AnalaR NORMAPUR) were added, and the aqueous phase was precipitated with

650 500  $\mu$ L of isopropanol (Carlo Erba Reagents). RNA pellets were rinsed with ethanol 70%  
651 (Carlo Erba Reagents) and dissolved in RNase-free water. Concentration and purity of  
652 individual RNA samples were assessed with NanoDrop 2000 (ThermoScientific) (260/280  
653 O.D. ratios) and integrity was checked using agarose gel (2%) electrophoresis. All RNA  
654 samples were stored at  $-80^{\circ}\text{C}$ .

655 For each sample,  $1\mu\text{g}$  of total RNA was reverse transcribed to cDNA using Omniscript  
656 Reverse Transcription Kit (Qiagen) and OligodT primers ( $10\mu\text{M}$ ; Eurofins) in a final volume  
657 of  $20\mu\text{L}$  following the manufacturer's recommendations, then treated with RNase inhibitor  
658 (Promega).

659 Primers were designed using Japanese quail sequences (*Coturnix japonica* 2.0), in  
660 exonic regions common to all predicted variants, with Primer-BLAST NCBI  
661 (<https://www.ncbi.nlm.nih.gov/tools/primer-blast/>) and synthesized by Eurogentec. Primers  
662 sequences are specified in **Supplementary table 3**. The absence of primer secondary structure  
663 was analyzed using OligoEvaluator (Sigma-Aldrich, <http://www.oligoevaluator.com/>).

664 Quantitative PCR was performed on CFX-96 Real-Time PCR Detection System (Bio-  
665 Rad) using SsoAdvanced Universal SYBR Green Supermix (Bio-Rad) following the cycling  
666 conditions consisting of  $95^{\circ}\text{C}$  for 5 min, 39 cycles: 10 s at  $95^{\circ}\text{C}$  / 15 s at  $60^{\circ}\text{C}$  / 10 s at  $72^{\circ}\text{C}$ ,  
667 and  $95^{\circ}\text{C}$  for 10 min. A melting curve stage was added to ensure the presence of a unique  
668 amplicon. All the qPCR reactions were run in triplicate. The optimal cDNA dilution and  
669 calibration curves for each primer ( $10\mu\text{M}$ ) were established using a serial dilution (from 1/4 to  
670 1/64) of a mix of individual cDNA from each group. Efficiencies accepted were ranging from  
671 95 to 105%. Stability of housekeeping gene <sup>82</sup> expression between groups was not the same for  
672 each brain region. Consequently, hippocampus mRNA levels were normalized to *SUZ12*  
673 expression, arcopallium mRNA levels to *GAPDH* and *PGK1* expression, hypothalamus mRNA  
674 levels to *GAPDH*, *PGK1* and  $\beta$ -*actin* expression. Normalization was achieved with the  $2^{-\Delta\Delta C_t}$   
675 method and the normalization factor calculated from geNorm software (version 3.5,  
676 <https://genorm.cmgg.be/>).

## 677 **Short-chain fatty acid (SCFA) analysis in fecal samples**

678 Fecal contents from male quails were collected individually inside the isolators at Day  
679 6 and 20 by placing the quail in a box with a  $\gamma$ -irradiated plastic sheet on its bottom (45kGy,  
680 Scientific Animal Food and Engineering, Augy, France). The plastic sheet was changed  
681 between each quail to obtain individual samples. All the samples were stored at  $-80^{\circ}\text{C}$  before

682 SCFA analysis. Samples were water extracted and proteins were precipitated with  
683 phosphotungstic acid. A volume of 0.1  $\mu$ L supernatant fraction was analyzed for SCFA on a  
684 gas-liquid chromatograph (Autosystem XL; Perkin Elmer, Saint-Quentin-en-Yvelines, France)  
685 equipped with a split-splitless injector, a flame-ionization detector and a capillary column (15  
686 m x 0.53 mm, 0.5 $\mu$ m) impregnated with SP 1000 (FSCAP Nukol; Supelco, Saint-Quentin-  
687 Fallavier, France). Carrier gas (Hydrogen) flow rate was 10 mL/min and inlet, column and  
688 detector temperatures were 200°C, 100°C and 240°C, respectively. 2-Ethylbutyrate was used  
689 as the internal standard<sup>83</sup>. Samples were analyzed in duplicate. Data were collected and peaks  
690 integrated using the Turbochrom v. 6 software (Perkin Elmer, Courtaboeuf, France).

## 691 **Statistical analysis**

692 The results are presented as means  $\pm$  SEM. The significance level was set at  $p \leq 0.05$   
693 and  $0.05 < p \leq 0.10$  was considered as a trend. All statistical analyses were performed with R  
694 (version 3.5.1) and RStudio software (version 1.1.463).

695 The 16S rRNA gene sequences were clustered in operational taxonomic units (OTU)  
696 using Swarm. We performed additional filtering steps based on abundance criteria (i.e. the  
697 OTUs should be found in at least 3 samples; the minimum abundance threshold was set to 100  
698 sequences across all samples), chimera detection, and comparison to a PhiX contaminant  
699 database: this was performed using the dedicated tools implemented in FROGS. Lastly, the  
700 OTU taxonomic assignation was performed by a BLAST comparison against the silva 16S 132  
701 database followed by a careful manual curation. We only kept the OTUs presenting an  
702 abundance above 0.001 (for a total of 110 OTUs).

703 Inverse Simpson and Shannon  $\alpha$ -diversity indexes were calculated using the R-package  
704 vegan v. 2.5-6. Bray-Curtis distances were calculated and tested with ADONIS for significance  
705<sup>84</sup> and summarized by multidimensional. Differential abundances at the genus level among E+  
706 stressed quails, E+ unstressed quails, STRESS-T and CONTROL-T groups were assessed using  
707 Welsch t-tests corrected using Bonferonni's approach. The computations were performed using  
708 STAMP v 2.1.3.

709 Finally, the samples were compared using PICRUST2 v. 2.2.0\_b in order to infer  
710 microbial gene content from 16S rRNA gene data and associated enrichment of metabolic  
711 pathways<sup>85</sup>. The distribution of pathway abundances was visualized by PCA, using STAMP v  
712 2.1.3; differential pathway abundances were assessed using Welch's t-tests corrected using  
713 Bonferonni's method.

714 Behavioral data were analyzed using generalized linear mixed models (GLMM;  
715 package ‘lme4’ v 1.1-19) with group (STRESS-T or CONTROL-T), sex and interaction  
716 between group and sex as the fixed effects and the order in which the quails were tested as the  
717 random effect. In the novel environment test, where three quails were tested together, the trio  
718 number was used as the random effect. In the case of repeated measures as in the habituation  
719 and learning phase of the memory tests, group and day were used as the fixed effects with the  
720 order of passage as the random effect. GLMMs were used when data was not normally  
721 distributed: a GLMM with Gamma errors was used for the total distance traveled, the latencies  
722 and the time spent in the various zones during the different behavioral tests. A GLMM with  
723 Poisson errors was used to compare the number of entries in the different zones of the tests and  
724 the number of cups visited in the memory tests. During the novel object test, we compared the  
725 number of quails that escaped in each group using a Chi2 test.

726 Corticosterone data were first log-transformed and then tested using a generalized linear  
727 model (GLMM; package ‘lme4’ v 1.1-19) with group as the main factor and the order of  
728 collection as the random factor.

729 Gene expression data and SCFA concentration were also analyzed with generalized  
730 linear mixed models (GLMM; package ‘lme4’ v 1.1-19) with Gamma law and the group as the  
731 fixed effect.

## 732 **Declarations**

### 733 **Availability of data and materials**

734 The datasets used during the current study are available from the corresponding author on  
735 reasonable request and they are available at <https://doi.org/10.15454/JYITK4>. Illumina  
736 sequence data have been deposited at National Center for Biotechnology Information (NCBI),  
737 under the BioProject PRJNA 527873.

### 738 **Disclosure of interest**

739 The authors report no conflict of interest.  
740

### 741 **Funding**

742 This work was supported by grants from the PHASE Division of INRAE.

## 743 **Author's contributions**

744 CL and NK designed the study with the help of LC and SR. CL and NK performed the  
745 experiments with the technical help of JL, CP, PC, TC and P. Cousin. FL performed the chronic  
746 stress procedure. The DNA microbial extraction and PCR steps were carried out by KG and  
747 CD. OZ was in charge of 16S rRNA gene sequencing and FK performed the statistical analysis  
748 of microbiota data. AF and MPM were in charge of plasma corticosterone measures. JL, NK,  
749 AVC, VC and HD performed RNA extraction and qPCR on brains. CP performed SCFA  
750 analysis. NK and CL wrote the manuscript. All the authors reviewed and approved the final  
751 manuscript.

## 752 **Acknowledgements**

753 We thank Sandrine Rivière and Michael Troquet for providing germ-free eggs and  
754 conducting blood sampling (UE PEAT, INRAE, 2018. Experimental Poultry Facility, DOI:  
755 10.15454/1.5572326250887292E12) and Sébastien Lavillatte, Maud Renouard and Edouard  
756 Guitton (PFIE, INRA, 2018. Infectiology of Farm, Model and Wild Animals Facility,  
757 <https://doi.org/10.15454/1.5572352821559333E12>) in charge of maintenance of the isolators  
758 and animal care. We would like to thank Irène Gabriel (INRAE Centre Val de Loire) and Marie-  
759 José Butel (University Paris Descartes) for scientific discussion and advice. We are grateful to  
760 Cindy Slugocki from the CIRM-BP Platform for checking the germ-free status.

761

## 762 **References**

763

- 764 1. Fröhlich EE, Farzi A, Mayerhofer R, Reichmann F, Jačan A, Wagner B, Zinser E,  
765 Bordag N, Magnes C, Fröhlich E, et al. Cognitive impairment by antibiotic-induced gut  
766 dysbiosis: Analysis of gut microbiota-brain communication. *Brain Behav Immun* 2016;  
767 56:140–55.
- 768 2. Cryan JF, O’Riordan KJ, Cowan CSM, Sandhu K V., Bastiaanssen TFS, Boehme M,  
769 Codagnone MG, Cussotto S, Fulling C, Golubeva AV, et al. The microbiota-gut-brain  
770 axis. *Physiol Rev* 2019; 99:1877–2013.
- 771 3. Sherwin E, Dinan TG, Cryan JF. Recent developments in understanding the role of the  
772 gut microbiota in brain health and disease. *Ann N Y Acad Sci* 2017; 17:1–21.



- 773 4. Madison A, Kiecolt-Glaser JK. Stress, depression, diet, and the gut microbiota:  
774 human–bacteria interactions at the core of psychoneuroimmunology and nutrition. *Curr*  
775 *Opin Behav Sci* 2019; 28:105–10.
- 776 5. Petra AI, Panagiotidou S, Hatziagelaki E, Stewart JM, Theoharides TC, Hospital AG,  
777 Division I. Gut-microbiota-brain axis and effect on neuropsychiatric disorders with  
778 suspected immune dysregulation. *Clin Ther* 2016; 37:984–95.
- 779 6. Liu S, Jiguo G, Mingqin Z, Kangding L, Hong-Liang Z. Gut Microbiota and Dysbiosis  
780 in Alzheimer’s Disease: Implications for Pathogenesis and Treatment. *Mol Neurobiol*  
781 2020; 57:5026–43.
- 782 7. De Palma G, Collins SM, Bercik P. The microbiota-gut-brain axis in functional  
783 gastrointestinal disorders. *Gut Microbes* 2014; 5:419–29.
- 784 8. Chevalier G, Siopi E, Guenin-Macé L, Pascal M, Laval T, Rifflet A, Boneca IG,  
785 Demangel C, Colsch B, Pruvost A, et al. Effect of gut microbiota on depressive-like  
786 behaviors in mice is mediated by the endocannabinoid system. *Nat Commun* 2020; 11.
- 787 9. Molina-Torres G, Rodriguez-Arrastia M, Roman P, Sanchez-Labraca N, Cardona D.  
788 Stress and the gut microbiota-brain axis. *Behav Pharmacol* 2019; 30:187–200.
- 789 10. Joëls M, Pu Z, Wiegert O, Oitzl MS, Krugers HJ. Learning under stress: how does it  
790 work? *Trends Cogn Sci* 2006; 10:152–8.
- 791 11. Sandi C, Pinelo-Nava MT. Stress and memory: Behavioral effects and neurobiological  
792 mechanisms. *Neural Plast* 2007; 2007.
- 793 12. Shors TJ. Stressful Experience and Learning Across the Lifespan. *Annu Rev Psychol*  
794 2006; 57:55–85.
- 795 13. Conrad CD. A critical review of chronic stress effects on spatial learning and memory.  
796 *Prog Neuro-Psychopharmacology Biol Psychiatry* 2010; 34:742–55.
- 797 14. Sandi C. Stress and cognition. *WIREs Cogn Sci* 2013; 4:245–61.
- 798 15. Moreira PS, Almeida PR, Leite-Almeida H, Sousa N, Costa P. Impact of chronic stress  
799 protocols in learning and memory in rodents: Systematic review and meta-analysis.  
800 *PLoS One* 2016; 11:1–24.
- 801 16. Gareau MG. *Cognitive Function and the Microbiome*. 1st ed. Elsevier Inc.; 2016.
- 802 17. Li W, Dowd SE, Scurlock B, Acosta-Martinez V, Lyte M. Memory and learning  
803 behavior in mice is temporally associated with diet-induced alterations in gut bacteria.  
804 *Physiol Behav* 2009; 96:557–67.
- 805 18. Bruce-Keller AJ, Salbaum JM, Luo M, Blanchard E, Taylor CM, Welsh DA, Berthoud  
806 HR. Obese-type gut microbiota induce neurobehavioral changes in the absence of

- 807 obesity. *Biol Psychiatry* 2015; 77:607–15.
- 808 19. Jørgensen BP, Hansen JT, Krych L, Larsen C, Klein AB, Nielsen DS, Josefsen K,  
809 Hansen AK, Sørensen DB. A Possible Link between Food and Mood : Dietary Impact  
810 on Gut Microbiota and Behavior in BALB/c Mice. *PLoS One* 2014; 9.
- 811 20. Gareau MG, Wine E, Rodrigues DM, Cho JH, Whary MT, Philpott DJ, Macqueen G,  
812 Sherman PM. Bacterial infection causes stress-induced memory dysfunction in mice.  
813 *Gut* 2011; 60:307–17.
- 814 21. Lu J, Synowiec S, Lu L, Yu Y, Bretherick T, Takada S, Yarnykh V, Caplan J, Caplan  
815 M, Claud EC, et al. Microbiota influence the development of the brain and behaviors in  
816 C57BL/6J mice. *PLoS One* 2018; 13:1–29.
- 817 22. Mao JH, Kim YM, Zhou YX, Hu D, Zhong C, Chang H, Brislawn CJ, Fansler S,  
818 Langley S, Wang Y, et al. Genetic and metabolic links between the murine microbiome  
819 and memory. *Microbiome* 2020; 8:1–14.
- 820 23. Bravo JA, Forsythe P, Chew M V, Escaravage E, Savignac HM, Dinan TG,  
821 Bienenstock J, Cryan JF. Ingestion of *Lactobacillus* strain regulates emotional behavior  
822 and central GABA receptor expression in a mouse via the vagus nerve. *Pnas* 2011;  
823 108:16050–5.
- 824 24. Savignac HM, Tramullas M, Kiely B, Dinan TG, Cryan JF. Bifidobacteria modulate  
825 cognitive processes in an anxious mouse strain. *Behav Brain Res* 2015; 287:59–72.
- 826 25. Yang X, Yu D, Xue L, Li H, Du J. Probiotics modulate the microbiota–gut–brain axis  
827 and improve memory deficits in aged SAMP8 mice. *Acta Pharm Sin B* 2020; 10:475–  
828 87.
- 829 26. Liang S, Wang T, Hu X, Luo J, Li W, Wu X, Duan Y, Jin F. Administration of  
830 *Lactobacillus helveticus* NS8 improves behavioral, cognitive, and biochemical  
831 aberrations caused by chronic restraint stress. *Neuroscience* 2015; 310:561–77.
- 832 27. O’Hagan C, Li JV, Marchesi JR, Plummer S, Garaiova I, Good MA. Long-term multi-  
833 species *Lactobacillus* and *Bifidobacterium* dietary supplement enhances memory and  
834 changes regional brain metabolites in middle-aged rats. *Neurobiol Learn Mem* 2017;  
835 144:36–47.
- 836 28. Davari S, Talaei SA, Alaei H, Salami M. Probiotics treatment improves diabetes-  
837 induced impairment of synaptic activity and cognitive function: Behavioral and  
838 electrophysiological proofs for microbiome-gut-brain axis. *Neuroscience* 2013;  
839 240:287–96.
- 840 29. Bagga D, Reichert JL, Koschutnig K, Aigner CS, Holzer P, Koskinen K, Moissl-

- 841 Eichinger C, Schöpf V. Probiotics drive gut microbiome triggering emotional brain  
842 signatures. *Gut Microbes* 2018; 0:1–11.
- 843 30. Higarza SG, Arboleya S, Arias JL, Gueimonde M, Arias N. *Akkermansia muciniphila*  
844 and environmental enrichment reverse cognitive impairment associated with high-fat  
845 high-cholesterol consumption in rats. *Gut Microbes* 2021; 13:1–20.
- 846 31. Desbonnet L, Clarke G, Traplin A, O’Sullivan O, Crispie F, Moloney RD, Cotter PD,  
847 Dinan TG, Cryan JF. Gut microbiota depletion from early adolescence in mice:  
848 Implications for brain and behaviour. *Brain Behav Immun* 2015; 48:165–73.
- 849 32. Lormant F, Ferreira VHB, Meurisse M, Lemarchand J, Constantin P, Morisse M,  
850 Cornilleau F, Parias C, Chaillou E, Bertin A, et al. Emotionality modulates the impact  
851 of chronic stress on memory and neurogenesis in birds. *Sci Rep* 2020; 10:1–13.
- 852 33. Lormant F, Ferreira VHB, Lemarchand J, Cornilleau F, Constantin P, Parias C, Bertin  
853 A, Lansade L, Leterrier C, Lévy F, et al. Training level reveals a dynamic dialogue  
854 between stress and memory systems in birds. *Behav Brain Res* 2021; 408.
- 855 34. Kraimi N, Calandreau L, Biesse M, Rabot S, Guitton E, Velge P, Leterrier C. Absence  
856 of gut microbiota reduces emotional reactivity in Japanese quails (*Coturnix japonica*).  
857 *Front Physiol* 2018; 9:1–9.
- 858 35. Parois S, Calandreau L, Kraimi N, Gabriel I, Leterrier C. The influence of a probiotic  
859 supplementation on memory in quail suggests a role of gut microbiota on cognitive  
860 abilities in birds. *Behav Brain Res* 2017; 331:47–53.
- 861 36. Kraimi N, Calandreau L, Zemb O, Germain K, Dupont C, Velge P, Guitton E,  
862 Lavillatte S, Parias C, Leterrier C. Effects of gut microbiota transfer on emotional  
863 reactivity in Japanese quails (*Coturnix japonica*). *J Exp Biol* 2019; 222:jeb202879.
- 864 37. Kraimi N, Dawkins M, Gebhardt-Henrich SG, Velge P, Rychlik I, Volf J, Creach P,  
865 Smith A, Colles F, Leterrier C. Influence of the microbiota-gut-brain axis on behavior  
866 and welfare in farm animals: A review. *Physiol Behav* 2019; 210.
- 867 38. Lyte JM, Keane J, Eckenberger J, Anthony N, Shrestha S, Marasini D, Daniels KM,  
868 Caputi V, Donoghue AM, Lyte M. Japanese quail (*Coturnix japonica*) as a novel model  
869 to study the relationship between the avian microbiome and microbial endocrinology-  
870 based host-microbe interactions. *Microbiome* 2021; 9:1–24.
- 871 39. Calandreau L, Bertin A, Boissy A, Arnould C, Constantin P, Desmedt A, Guémené D,  
872 Nowak R, Leterrier C. Effect of one week of stress on emotional reactivity and learning  
873 and memory performances in Japanese quail. *Behav Brain Res* 2011; 217:104–10.
- 874 40. Calandreau L, Favreau-Peigné A, Bertin A, Constantin P, Arnould C, Laurence A,

- 875 Lumineau S, Houdelier C, Richard-Yris MA, Boissy A, et al. Higher inherent  
876 fearfulness potentiates the effects of chronic stress in the Japanese quail. *Behav Brain*  
877 *Res* 2011; 225:505–10.
- 878 41. Favreau-Peigné A, Calandreau L, Constantin P, Gaultier B, Bertin A, Arnould C,  
879 Laurence A, Richard-Yris MA, Houdelier C, Lumineau S, et al. Emotionality  
880 modulates the effect of chronic stress on feeding behaviour in birds. *PLoS One* 2014;  
881 9:1–12.
- 882 42. Laurence A, Houdelier C, Calandreau L, Arnould C, Favreau-Peigné A, Leterrier C,  
883 Boissy A, Lumineau S. Environmental enrichment reduces behavioural alterations  
884 induced by chronic stress in Japanese quail. *Animal* 2014; 9:331–8.
- 885 43. Pusceddu MM, El Aidy S, Crispie F, O’Sullivan O, Cotter P, Stanton C, Kelly P, Cryan  
886 JF, Dinan TG. N-3 polyunsaturated fatty acids (PUFAs) reverse the impact of early-life  
887 stress on the gut microbiota. *PLoS One* 2015; 10:1–13.
- 888 44. Bharwani A, Firoz Mian M, Foster JA, Surette MG, Bienenstock J, Forsythe P.  
889 Structural & functional consequences of chronic psychosocial stress on the microbiome  
890 & host. *Psychoneuroendocrinology* 2016; 63:217–27.
- 891 45. Sun Y, Zhang M, Chen C-C, Gilliland M, Sun X, Huffnagle GB, Young VB, Zhang J,  
892 Hong S-C, Chang Y-M, et al. Stress-Induced Corticotropin-Releasing Hormone-  
893 Mediated NLRP6 Inflammasome Inhibition and Transmissible Enteritis in Mice.  
894 *Gastroenterology* 2013; 144:S-122-S-123.
- 895 46. Li S, Wang Z, Yang Y, Yang S, Yao C, Liu K, Cui S, Zou Q, Sun H, Guo G.  
896 Lachnospiraceae shift in the microbial community of mice faecal sample effects on  
897 water immersion restraint stress. *AMB Express* 2017; 7.
- 898 47. Bangsgaard Bendtsen KM, Krych L, Sørensen DB, Pang W, Nielsen DS, Josefsen K,  
899 Hansen LH, Sørensen SJ, Hansen AK. Gut Microbiota Composition Is Correlated to  
900 Grid Floor Induced Stress and Behavior in the BALB/c Mouse. *PLoS One* 2012;  
901 7:e46231.
- 902 48. Naseribafrouei A, Hestad K, Avershina E, Sekelja M, Linløkken A, Wilson R, Rudi K.  
903 Correlation between the human fecal microbiota and depression. *Neurogastroenterol*  
904 *Motil* 2014; 26:1155–62.
- 905 49. Jiang H, Ling Z, Zhang Y, Mao H, Ma Z, Yin Y, Wang W, Tang W, Tan Z, Shi J, et al.  
906 Altered fecal microbiota composition in patients with major depressive disorder. *Brain*  
907 *Behav Immun* 2015; 48:186–94.
- 908 50. Prochazkova P, Roubalova R, Dvorak J, Kreisinger J, Hill M, Tlaskalova-Hogenova H,

- 909 Tomasova P, Pelantova H, Cermakova M, Kuzma M, et al. The intestinal microbiota  
910 and metabolites in patients with anorexia nervosa. *Gut Microbes* 2021; 13:1–25.
- 911 51. Laurence A, Houdelier C, Petton C, Calandreau L, Arnould C, Favreau-Peigné A,  
912 Leterrier C, Boissy A, Richard-Yris MA, Lumineau S. Japanese Quail’s Genetic  
913 Background Modulates Effects of Chronic Stress on Emotional Reactivity but Not  
914 Spatial Learning. *PLoS One* 2012; 7:3–10.
- 915 52. Favreau-Peigné A, Calandreau L, Constantin P, Bertin A, Arnould C, Laurence A,  
916 Richard-Yris MA, Houdelier C, Lumineau S, Boissy A, et al. Unpredictable and  
917 repeated negative stimuli increased emotional reactivity in male quail. *Appl Anim  
918 Behav Sci* 2016; 183:86–94.
- 919 53. Lindqvist C, Janczak AM, Nätt D, Baranowska I, Lindqvist N, Wichman A, Lundeberg  
920 J, Lindberg J, Torjesen PA, Jensen P. Transmission of stress-induced learning  
921 impairment and associated brain gene expression from parents to offspring in chickens.  
922 *PLoS One* 2007; 2:e364.
- 923 54. Lindqvist C, Jensen P. Domestication and stress effects on contrafreeloading and  
924 spatial learning performance in red jungle fowl (*Gallus gallus*) and White Leghorn  
925 layers. *Behav Processes* 2009; 81:80–4.
- 926 55. Squire LR. Memory systems of the brain: A brief history and current perspective.  
927 *Neurobiol Learn Mem* 2004; 82:171–7.
- 928 56. Squire LR, Zola-Morgan M. *Conscious and Unconscious Memory Systems*. Cold Spring  
929 Harb Perspect Med 2015; 7:a021667.
- 930 57. Lee J, Venna VR, Durgan DJ, Shi H, Hudobenko J, Putluri N, Petrosino J, McCullough  
931 LD, Bryan RM. Young versus aged microbiota transplants to germ-free mice: increased  
932 short-chain fatty acids and improved cognitive performance. *Gut Microbes* 2020; 12:1–  
933 14.
- 934 58. Reshetnikov VV., Studenikina AA, Ryabushkina JA, Merkulova TI, Bondar NP. The  
935 impact of early-life stress on the expression of HPA-associated genes in the adult  
936 murine brain. *Behaviour* 2018; 155:181–203.
- 937 59. Timpl P, Spanagel R, Sillaber I, Kresse A, Reul JM, Stalla GK, Blanquet V, Steckler T,  
938 Holsboer F, Würst W. Impaired stress response and reduced anxiety in mice lacking a  
939 functional corticotropin-releasing hormone receptor 1. *Nat Genet* 1998; 19:162–6.
- 940 60. Cyr NE, Michael Romero L. Chronic stress in free-living European starlings reduces  
941 corticosterone concentrations and reproductive success. *Gen Comp Endocrinol* 2007;  
942 151:82–9.

- 943 61. Rich EL. Exposure to chronic stress downregulates corticosterone responses to acute  
944 stressors. *AJP Regul Integr Comp Physiol* 2005; 288:R1628–36.
- 945 62. Dhaliwal G. Alistipes : The influence of a commensal on anxiety and depression.  
946 *Catalyst* 2019; 3:47–51.
- 947 63. Mangiola F, Ianiro G, Franceschi F, Fagioli S, Gasbarrini G, Gasbarrini A. Gut  
948 microbiota in autism and mood disorders. *World J Gastroenterol* 2016; 22:361–8.
- 949 64. Zhang C, Yin A, Li H, Wang R, Wu G, Shen J, Zhang M, Wang L, Hou Y, Ouyang H,  
950 et al. Dietary Modulation of Gut Microbiota Contributes to Alleviation of Both Genetic  
951 and Simple Obesity in Children. *EBioMedicine* 2015; 2:968–84.
- 952 65. Agus A, Planchais J, Sokol H. Gut Microbiota Regulation of Tryptophan Metabolism  
953 in Health and Disease. *Cell Host Microbe* 2018; 23:716–24.
- 954 66. O’Mahony SM, Clarke G, Borre YE, Dinan TG, Cryan JF. Serotonin, tryptophan  
955 metabolism and the brain-gut-microbiome axis. *Behav Brain Res* 2015; 277:32–48.
- 956 67. Siopi E, Chevalier G, Katsimpardi L, Saha S, Bigot M, Moigneu C, Eberl G, Lledo  
957 PM. Changes in Gut Microbiota by Chronic Stress Impair the Efficacy of Fluoxetine.  
958 *Cell Rep* 2020; 30:3682-3690.e6.
- 959 68. Deng Y, Zhou M, Wang J, Yao J, Yu J, Wu L, Wang J, Gao R. Involvement of the  
960 microbiota-gut-brain axis in chronic restraint stress : disturbances of the kynurenine  
961 metabolic pathway in both the gut and brain. *Gut Microbes* 2021; 13:1–16.
- 962 69. Mir HD, Milman A, Monnoye M, Douard V, Philippe C, Aubert A, Castanon N,  
963 Vancassel S, Guérineau NC, Naudon L, et al. The gut microbiota metabolite indole  
964 increases emotional responses and adrenal medulla activity in chronically stressed male  
965 mice. *Psychoneuroendocrinology* 2020; 119:104750.
- 966 70. Bienenstock J, Kunze W, Forsythe P. Microbiota and the gut-brain axis. *Nutr Rev*  
967 2015; 73(S1):28–31.
- 968 71. Cryan JF, Dinan TG. Mind-altering microorganisms: the impact of the gut microbiota  
969 on brain and behaviour. *Nat Rev Neurosci* 2012; 13:701–12.
- 970 72. Erny D, De Angelis ALH, Jaitin D, Wieghofer P, Staszewski O, David E, Keren-Shaul  
971 H, Mhlahkoiiv T, Jakobshagen K, Buch T, et al. Host microbiota constantly control  
972 maturation and function of microglia in the CNS. *Nat Neurosci* 2015; 18:965–77.
- 973 73. Heijtz DR, Wang S, Anuar F, Qian Y, Björkholm B, Samuelsson A, Hibberd ML,  
974 Forssberg H, Pettersson S. Normal gut microbiota modulates brain development and  
975 behavior. *Pnas* 2011; 108:3047–52.
- 976 74. Neufeld KM, Kang N, Bienenstock J, Foster JA, Kang N, Bienenstock J, Foster JA.

- 977 Effects of intestinal microbiota on anxiety-like behavior. *Commun Integr Biol* 2011;  
978 0889:492–4.
- 979 75. Saurman V, Margolis KG, Luna RA. Autism Spectrum Disorder as a Brain-Gut-  
980 Microbiome Axis Disorder. *Dig Dis Sci* 2020; 65:818–28.
- 981 76. Mills AD, Faure JM. Divergent Selection for Duration of Tonic Immobility and Social  
982 Reinstatement Behavior in Japanese Quail (*Coturnix Coturnix Japonica*) Chicks. *J*  
983 *Comp Psychol* 1991; 105:25–38.
- 984 77. Boissy A. Fear and fearfulness in animals. *Q Rev Biol* 1995; 70:165–91.
- 985 78. Coustham V, Godet E, Beauclair L. A simple PCR method for sexing Japanese quail  
986 *Coturnix japonica* at hatching. *Br Poult Sci* 2017; 58:59–62.
- 987 79. Schweitzer C, Houdelier C, Lumineau S, Lévy F, Arnould C. Social motivation does  
988 not go hand in hand with social bonding between two familiar Japanese quail chicks,  
989 *Coturnix japonica*. *Anim Behav* 2010; 79:571–8.
- 990 80. Kim JJ, Baxter MG. Multiple brain- memory systems : the whole does not equal the  
991 sum of its parts. *Trends Neurosci* 2001; 24:324–30.
- 992 81. Baylé JD, Ramade F, Oliver J. Stereotaxic topography of the brain of the quail  
993 (*Coturnix coturnix japonica*). *J Physiol* 1974; 68:219–41.
- 994 82. Carvalho AV, Couroussé N, Crochet S, Coustham V. Identification of reference genes  
995 for quantitative gene expression studies in three tissues of japanese quail. *Genes*  
996 (Basel) 2019; 10:197.
- 997 83. Rabot S, Szylit O, Nugon-Baudon L, Meslin JC, Vaissade P, Popot F, Viso M.  
998 Variations in digestive physiology of rats after short duration flights aboard the US  
999 space shuttle. *Dig Dis Sci* 2000; 45:1687–95.
- 1000 84. Oksanen J, Blanchet FG, M.Friendly R, P. K, Legendre PR, Minchin RB, O’Hara GL,  
1001 P. S, Solymos MHH, Stevens E, et al. *Vegan: Community Ecology Package*. R  
1002 Package Version 2.4–2. 2017;
- 1003 85. Langille MGI, Zaneveld J, Caporaso JG, McDonald D, Knights D, Reyes JA, Clemente  
1004 JC, Burkepille DE, Vega Thurber RL, Knight R, et al. Predictive functional profiling of  
1005 microbial communities using 16S rRNA marker gene sequences. *Nat Biotechnol* 2013;  
1006 31:814–21.

1009 **Figures legends**

1010 **Figure 1:** Comparison of the operational taxonomic units in cecal contents of Unstressed (n =  
1011 4) and Stressed (n = 4), CONTROL-T (n = 18) and STRESS-T (n = 17) groups at Day 14 and  
1012 CONTROL-T (n = 16) and STRESS-T (n = 18) groups at Day 36 for (a) Shannon and  
1013 Inverse Simpson  $\alpha$ -diversity indexes, (b) non-Metric Multidimensional Scaling (NMDS)  
1014 representation of Bray–Curtis distances, (c) PCA visualization of the pathway enrichment  
1015 analysis derived from the taxonomic profiles, (d) Function prediction levels of the  
1016 tryptophanase activity (EC:4.1.99.1). The results are expressed as mean values  $\pm$  SEM. \*  $p <$   
1017 0.05, \*\*  $p \leq 0.01$ , \*\*\*  $p \leq 0.0001$ .

1018  
1019 **Figure 2:** Relative abundance of major bacterial phyla (a) and genera (b) in the cecal  
1020 contents of unstressed (n = 4) and stressed (n = 4) quails, CONTROL-T (n = 18) and  
1021 STRESS-T (n = 17) groups at Day 14 and CONTROL-T (n = 16) and STRESS-T (n = 18)  
1022 groups at Day 36.

1023  
1024 **Figure 3:** (a) Average time spent in the wall zone (WZ) during the novel environment test in  
1025 the CONTROL-T (n=36) and STRESS-T (n = 36) groups. (b) Number of quails that escaped  
1026 from the device during the novel object test in the CONTROL-T (n = 36) and STRESS-T (n =  
1027 36) groups. (c) Distance traveled during the open-field test in the CONTROL-T group (n = 16)  
1028 and the STRESS-T group (n = 18). (d) Number of entries in the wall zone (WZ) during the  
1029 social separation test in the CONTROL-T (n = 36) and STRESS-T (n = 36) groups. (e) Basal  
1030 plasma corticosterone levels on Day 14 in the CONTROL-T group (n = 16) and the STRESS-  
1031 T group (n = 15). The results are expressed as mean values  $\pm$  SEM. \*  $p < 0.05$ , \*\*  $p \leq 0.01$ .

1032  
1033 **Figure 4:** Latency (a) and number of cups visited (b) before reaching the rewarded cup  
1034 during the 4 days of training in the CONTROL-T group (n = 15) and the STRESS-T group (n  
1035 = 15). Latency (c) and number of cups visited (d) before finding the location of the previous  
1036 rewarded cup during the spatial test in the CONTROL-T group (n = 15) and the STRESS-T  
1037 group (n = 15). Latency to reach the cued cup (e) and number of cups visited before reaching  
1038 the cued cup (f) in the CONTROL-T group (n = 15) and the STRESS-T group (n = 14) during  
1039 the cued test. The results are expressed as mean values  $\pm$  SEM. \*  $p < 0.05$ .

1040  
1041 **Figure 5:** Gene expression in the hippocampus (a, CONTROL-T: n = 11, STRESS-T: n = 17),  
1042 the arcopallium (b, CONTROL-T: n = 12, STRESS-T: n = 17) and the hypothalamus (c,  
1043 CONTROL-T: n = 15, STRESS-T: n = 17). The results are expressed as mean values  $\pm$  SEM.



1044 \*  $p < 0.05$ .

1045

1046 **Figure 6:** A vicious loop *via* gut microbiota. Stress and disturbed environment conditions (**a**)  
1047 induce alterations in the gut microbiota. This disturbed gut microbiota is able to induce impaired  
1048 memory by itself, even if the environment is not stressful (demonstration in the present study,  
1049 **b**). As a consequence, the gut microbiota and brain would result in a loop that maintains  
1050 memory impairments (**c**).

1051

1052

1053

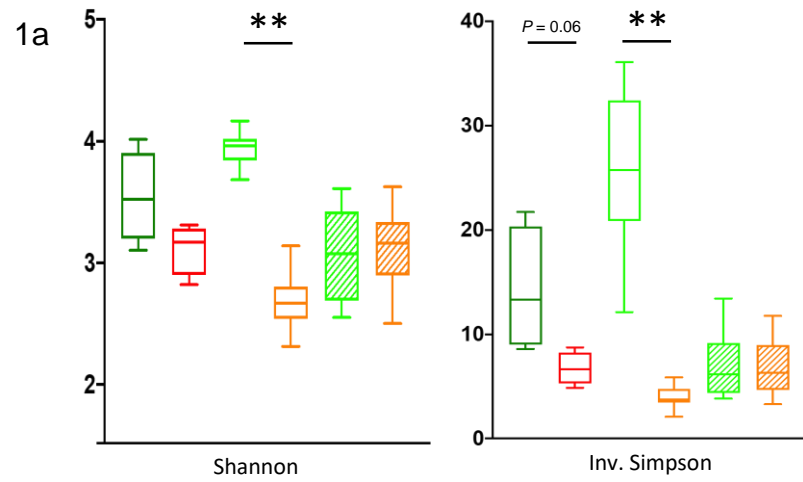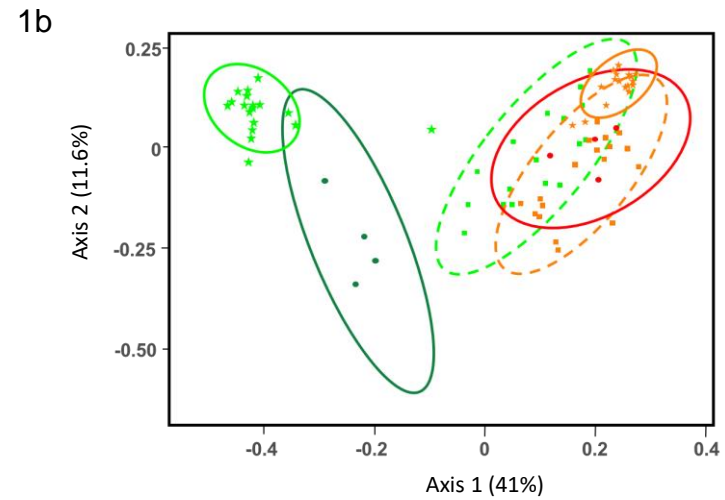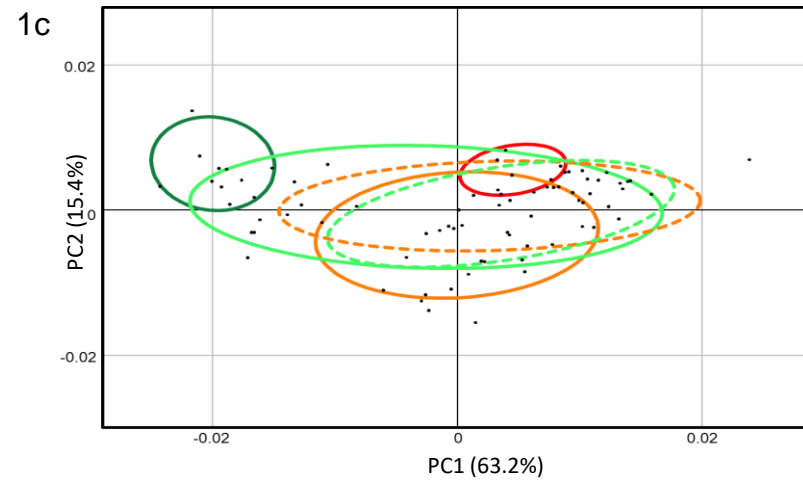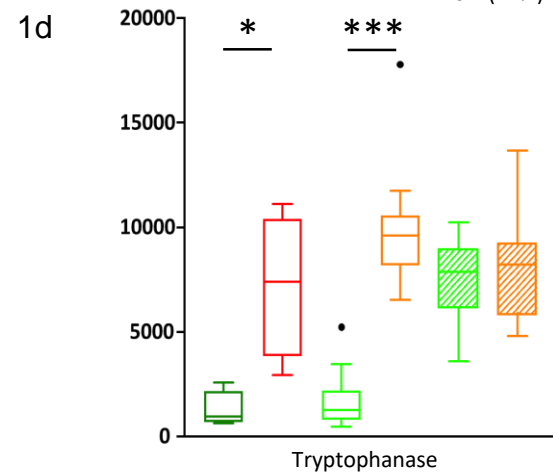

Unstressed

Stressed

CONTROL-T (Day 14)

STRESS-T (Day 14)

CONTROL-T (Day 36)

STRESS-T (Day 36)

2a

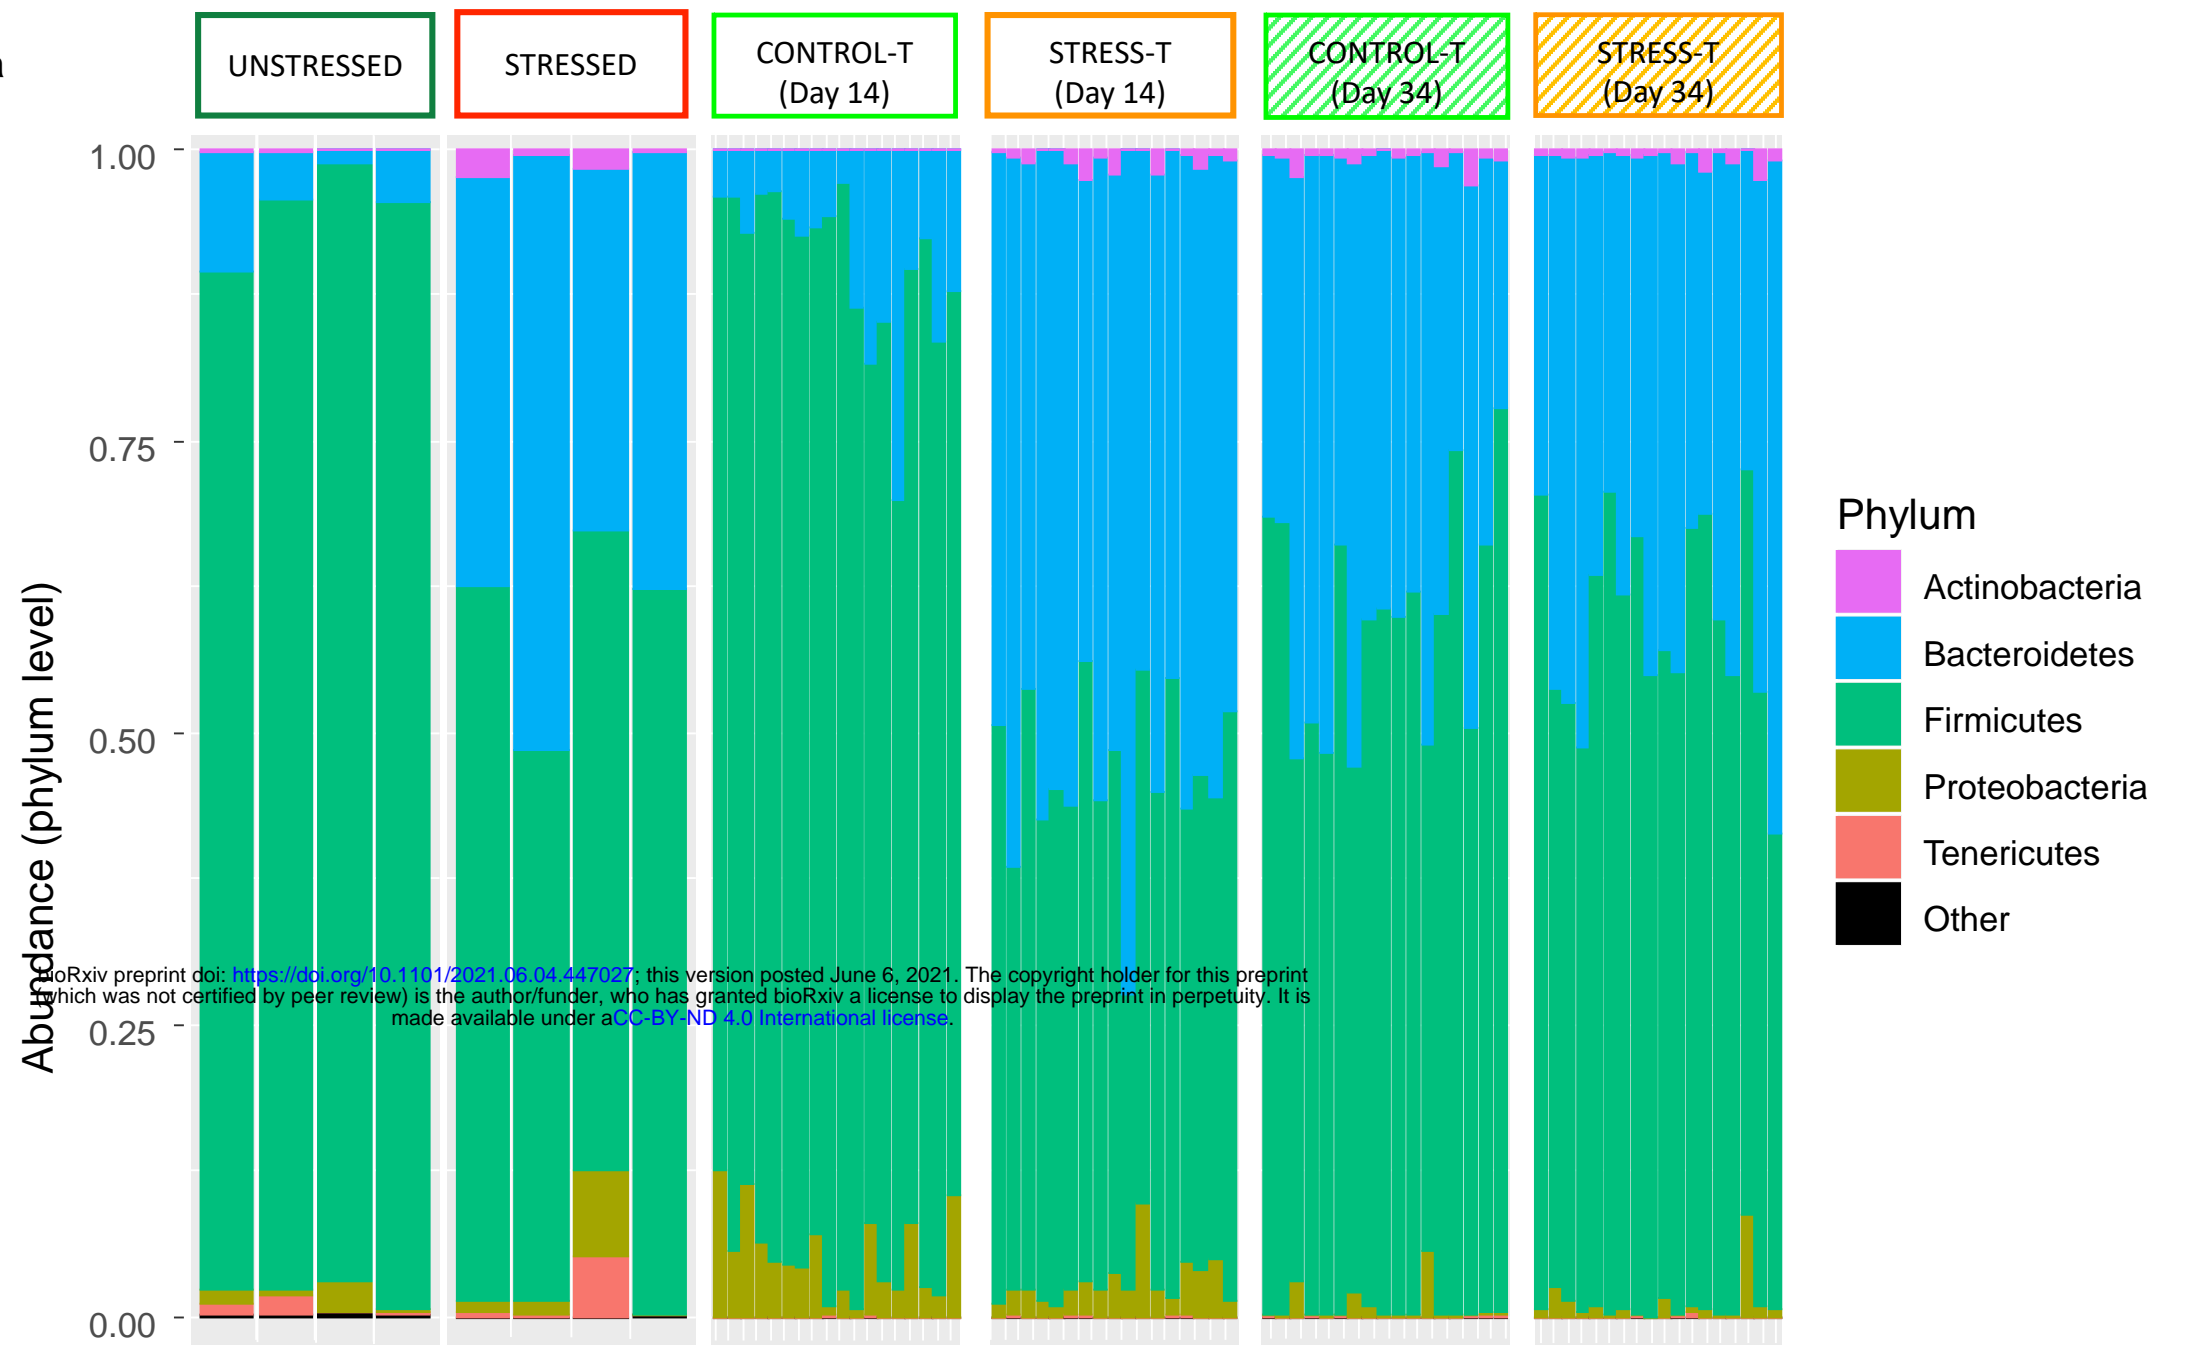

2b

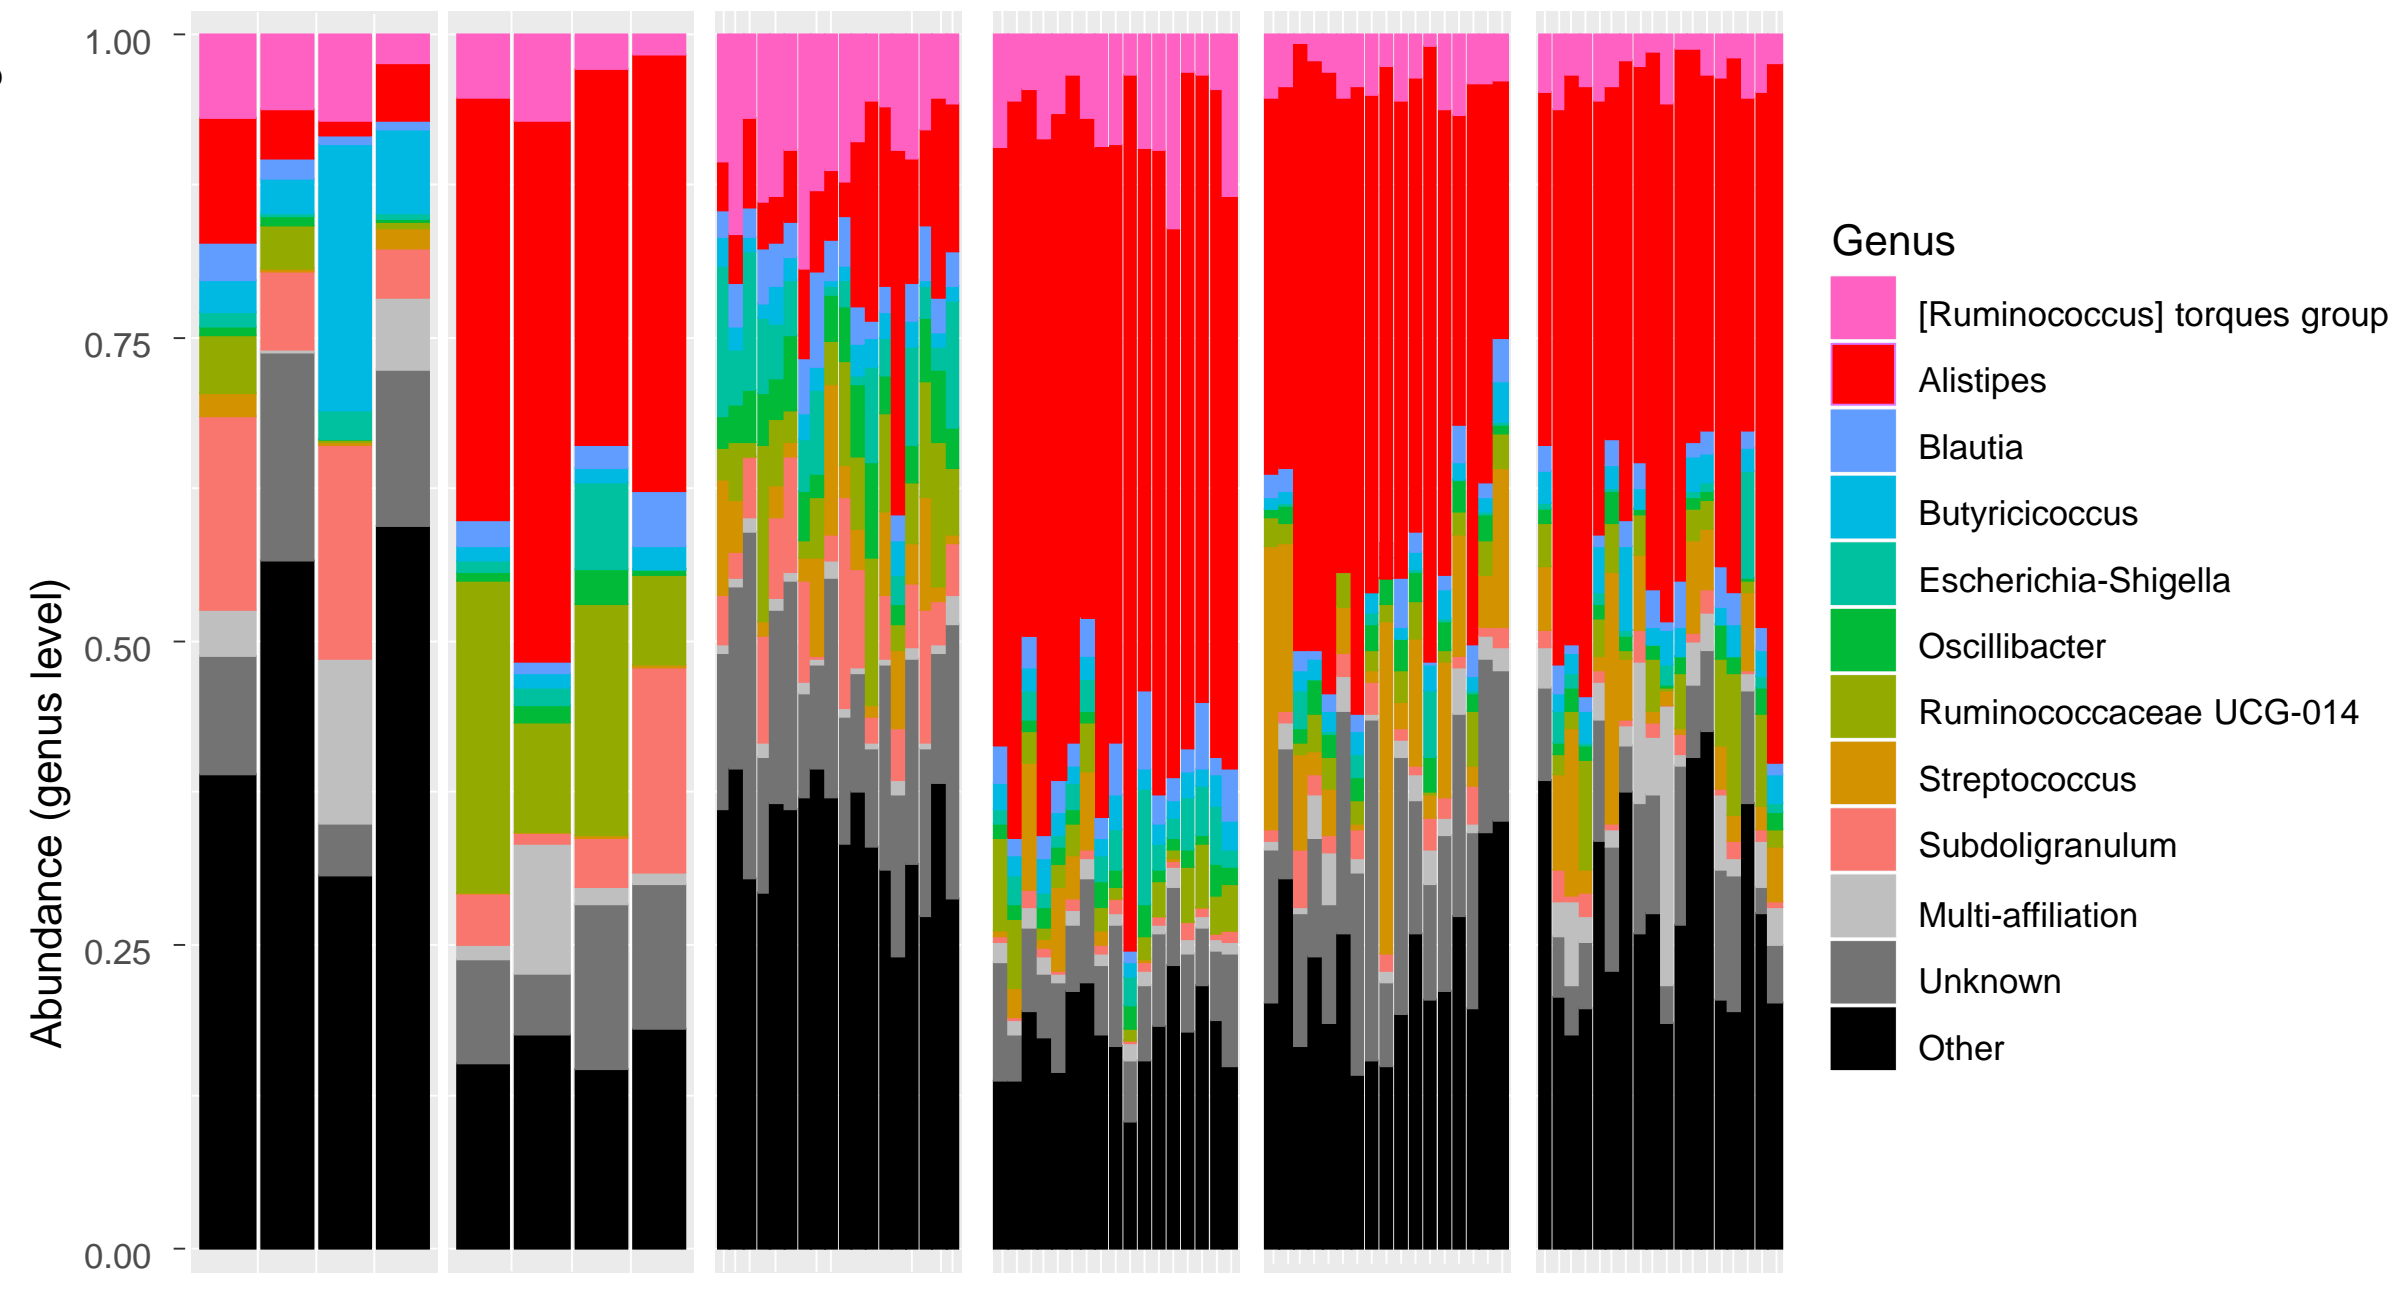

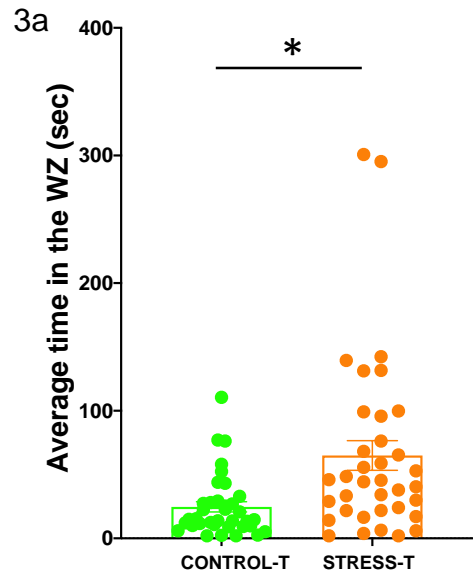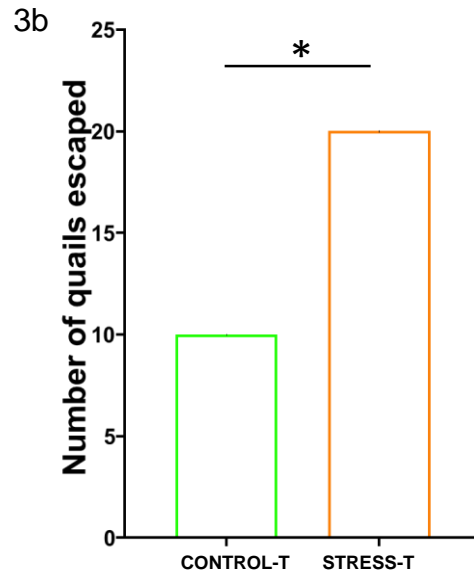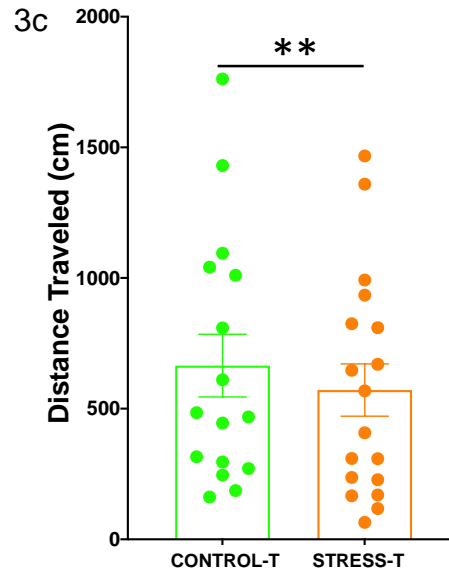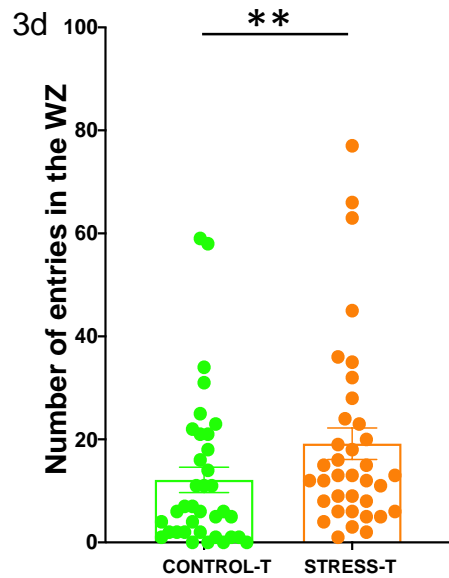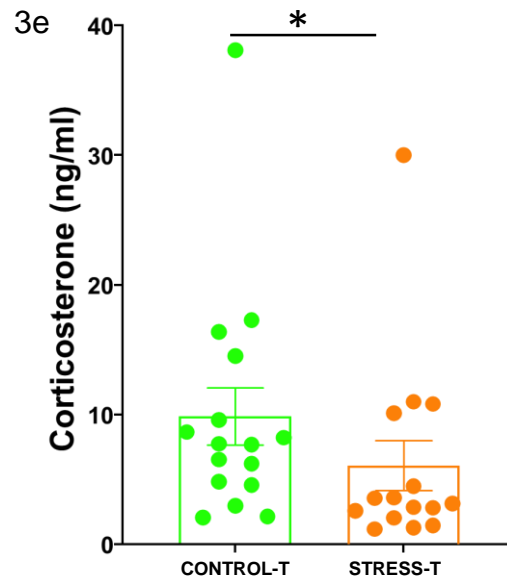

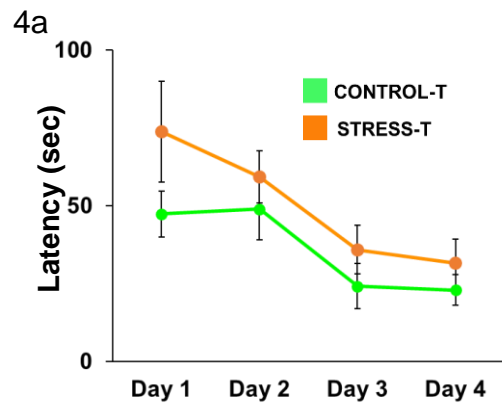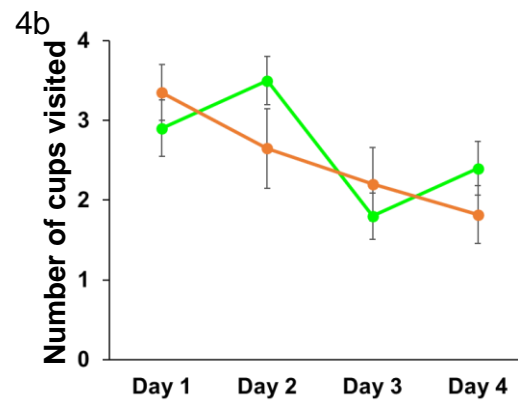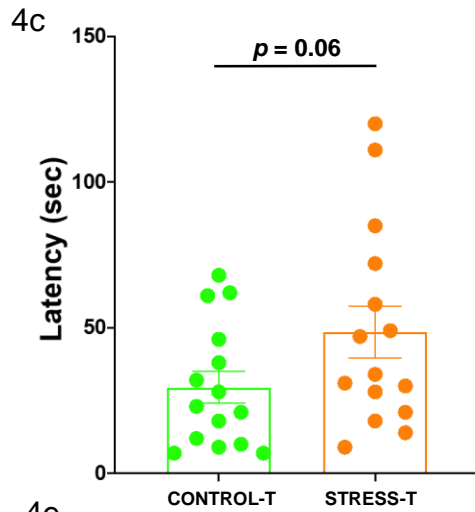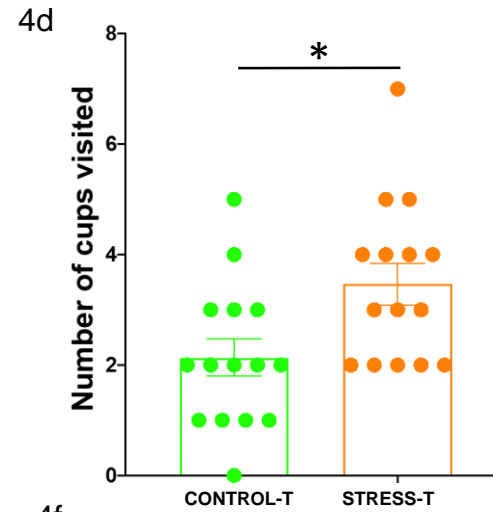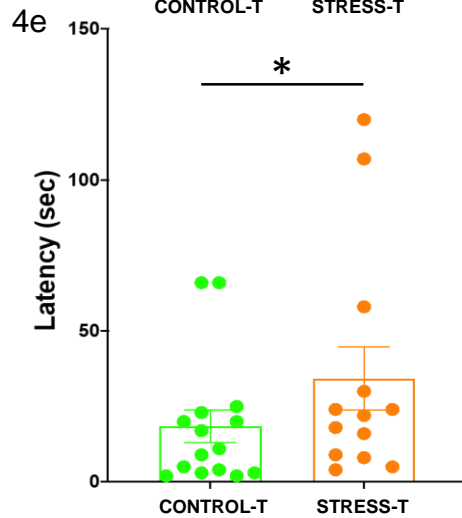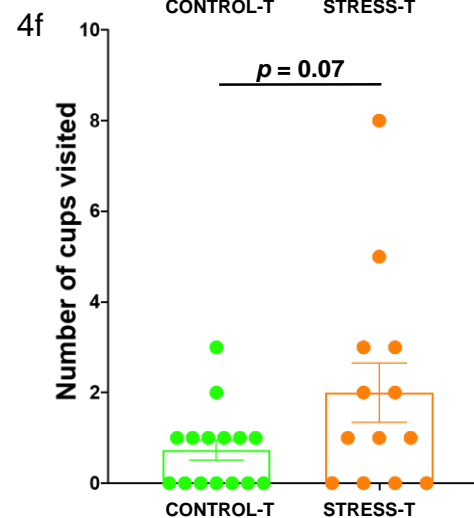

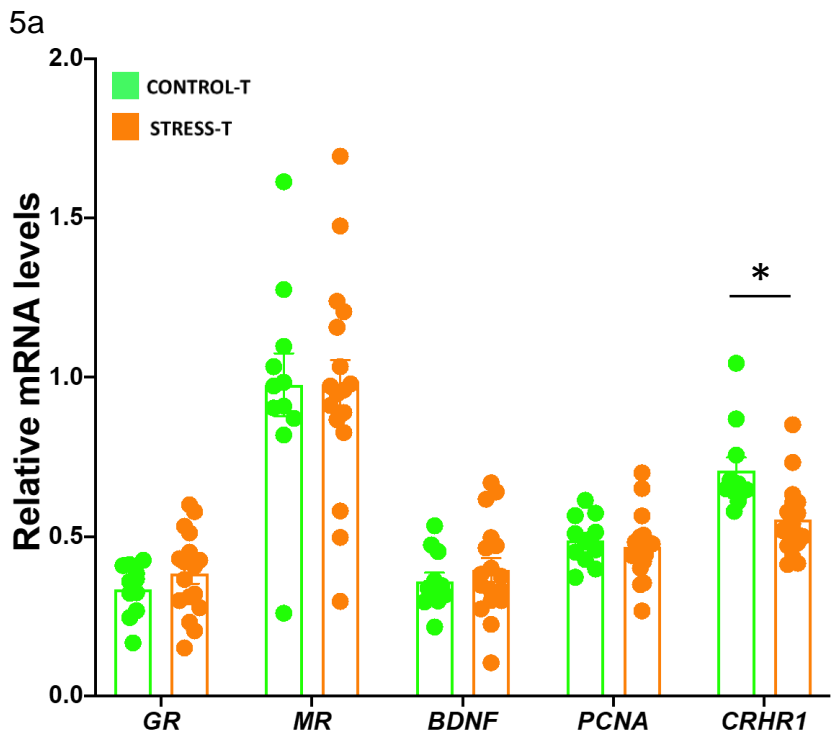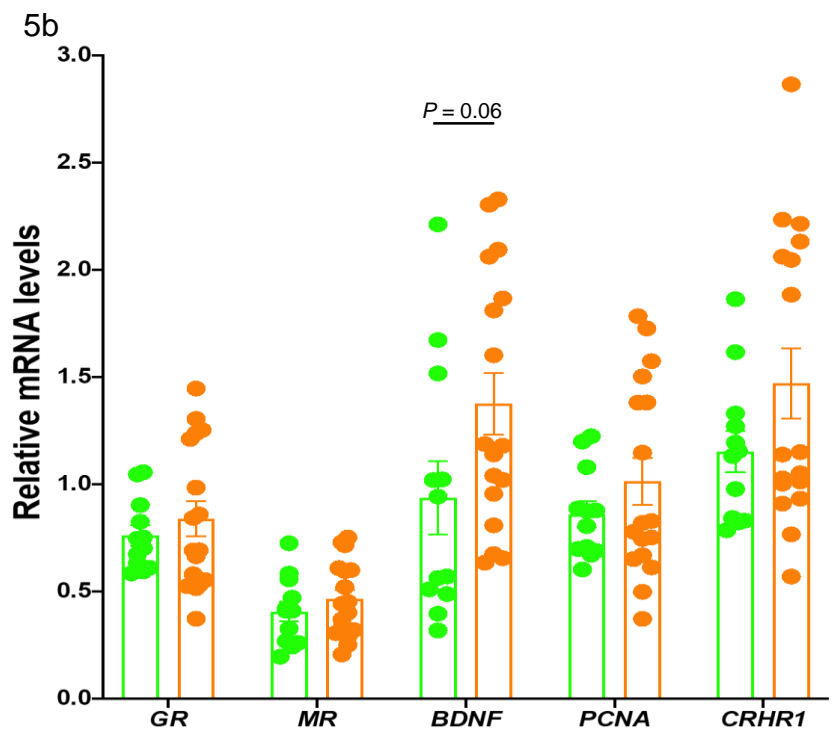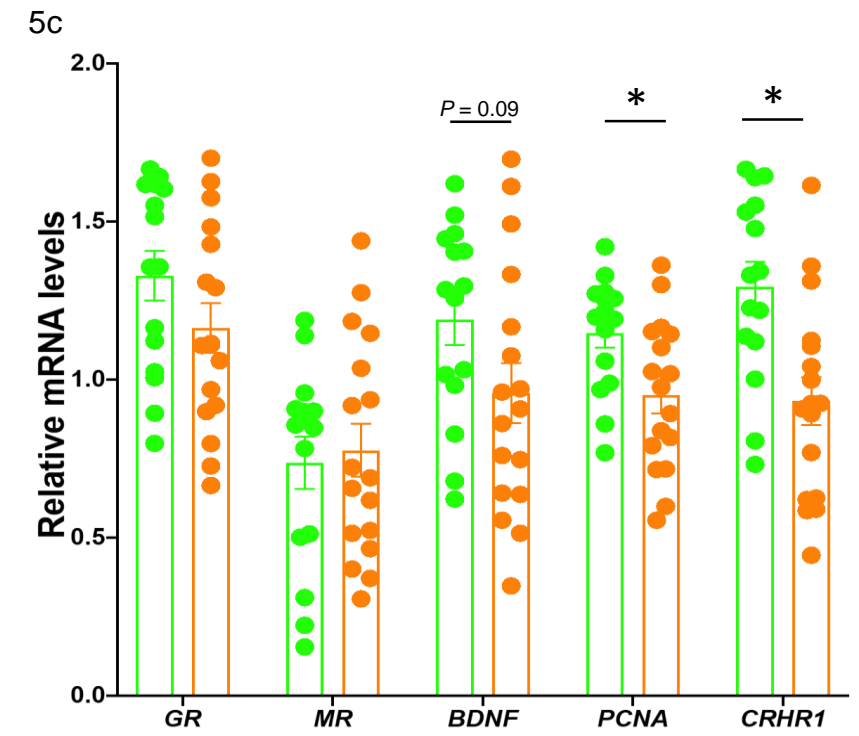

Figure 6

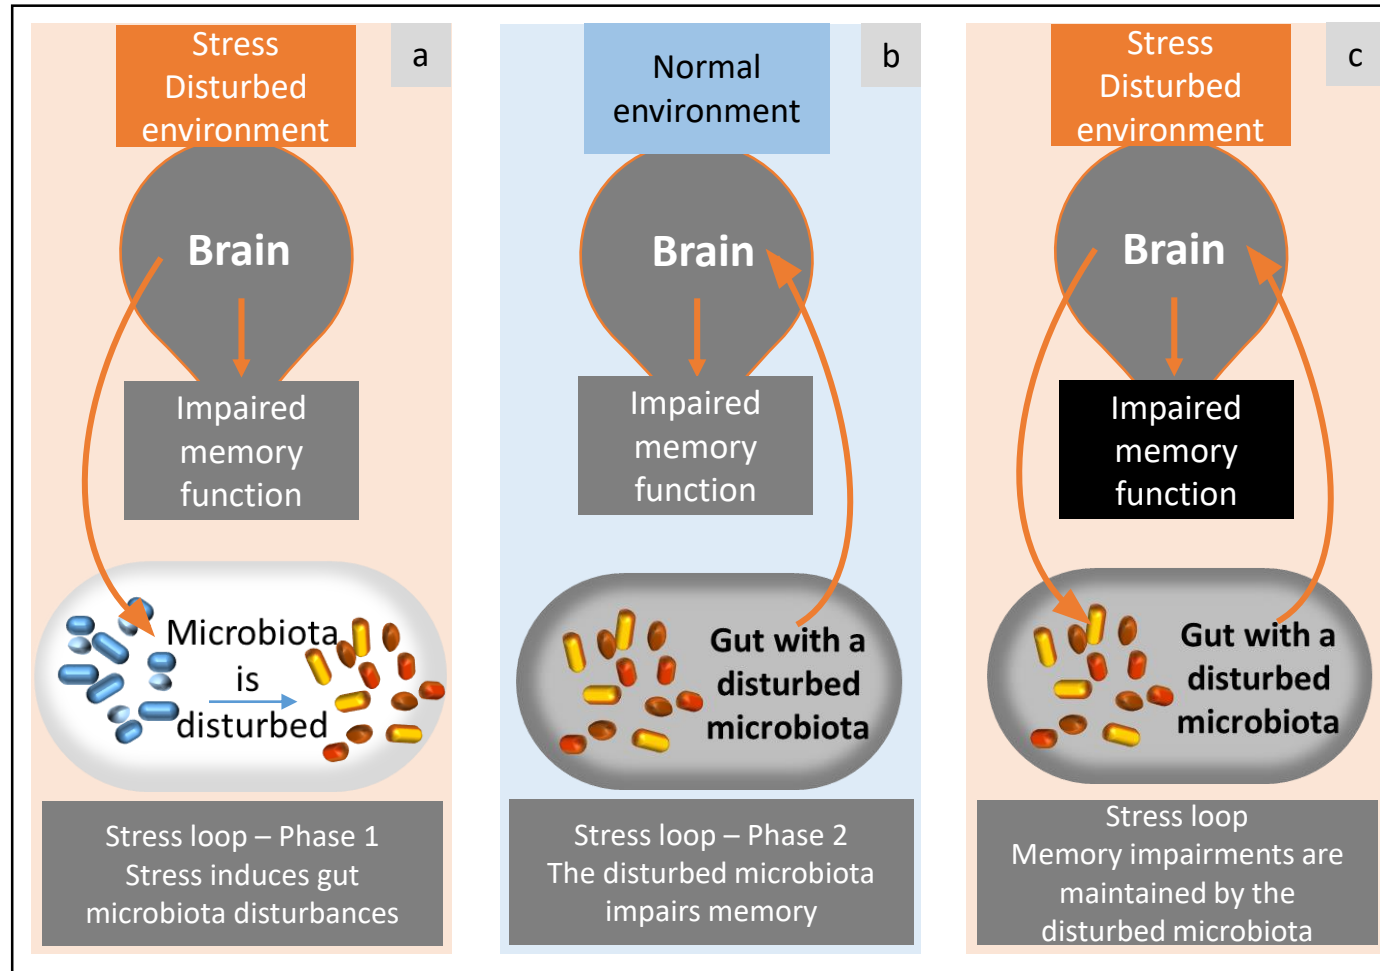

## Supplementary files

**Supplementary figure:** (a) Timing of the experimental design. Germ-free quails hatched in germ-free conditions in isolators (Day 0 = D0). After bacterial inoculation on Day 2 with cecal microbiota from a stressed or unstressed individual, the anxiety-like behavior was assessed on males and females using different behavioral tests in isolator. On Day 14 blood samples were collected for plasma corticosterone measures followed by memory tests starting on Day 17. An open-field test was performed on Day 33 to evaluate the final anxiety-like behavior level of quails before euthanasia and brains were collected for gene expression measures. (b) Picture of the experimental isolator used to ensure a controlled microbial environment. (c) The wall zone used for the novel environment test and social separation test (black circles = quails). The wall zone represents proximity with the other quails. (d) Schematic representation of the arena and disposition of cups used for training.

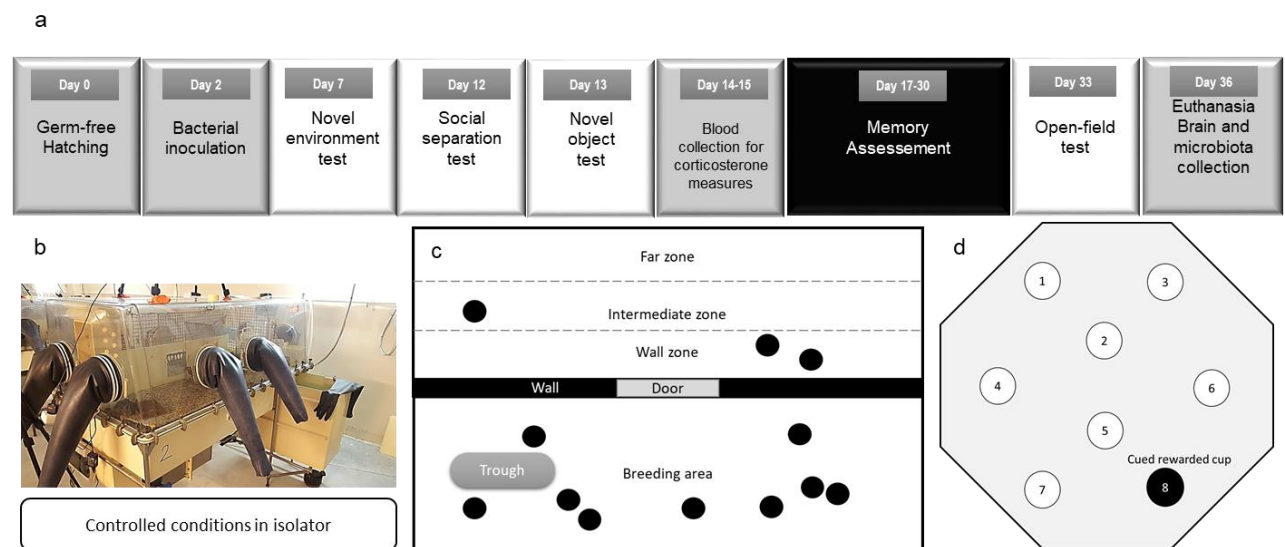



**Supplementary table 1:** KEGG pathways predicted in the gut microbiota samples of CONTROL-T and STRESS-T groups at 14 days of age. We only report here the enriched pathways presenting significant differences between the groups (corrected  $p < 0.05$ ) and presenting a mean relative abundance  $> 0.05\%$ . The L-tryptophan biosynthesis pathway is highlighted in red.

| Pathway identifier                             | Description                                                      | CONTROL<br>mean relative<br>frequency<br>(standard<br>deviation) | STRESS<br>mean relative<br>frequency<br>(standard<br>deviation) | Corrected p-<br>value |
|------------------------------------------------|------------------------------------------------------------------|------------------------------------------------------------------|-----------------------------------------------------------------|-----------------------|
| <i>Pathways more abundant in CONTROL group</i> |                                                                  |                                                                  |                                                                 |                       |
| PWY0-1586                                      | peptidoglycan maturation<br>(meso-diaminopimelate<br>containing) | 0.807 (0.033)                                                    | 0.679 (0.035)                                                   | 6.66E-16              |
| P161-PWY                                       | acetylene degradation                                            | 0.805 (0.033)                                                    | 0.683 (0.035)                                                   | 1.78E-15              |
| COBALSYN-PWY                                   | adenosylcobalamin salvage<br>from cobinamide I                   | 1.218 (0.072)                                                    | 1.104 (0.040)                                                   | 5.82E-13              |
| PWY-5505                                       | L-glutamate and L-glutamine<br>biosynthesis                      | 0.553 (0.035)                                                    | 0.460 (0.074)                                                   | 4.00E-11              |
| PWY-5100                                       | pyruvate fermentation to<br>acetate and lactate II               | 1.334 (0.048)                                                    | 1.268 (0.030)                                                   | 4.22E-15              |
| PWY0-1296                                      | purine ribonucleosides<br>degradation                            | 0.805 (0.038)                                                    | 0.743 (0.056)                                                   | 4.00E-13              |
| TRPSYN-PWY                                     | <b>L-tryptophan biosynthesis</b>                                 | 1.008 (0.043)                                                    | 1.055 (0.035)                                                   | 2.78E-14              |
| PWY-6151                                       | S-adenosyl-L-methionine cycle<br>I                               | 0.927 (0.040)                                                    | 0.980 (0.036)                                                   | 3.18E-14              |
| PWY-621                                        | sucrose degradation III (sucrose<br>invertase)                   | 0.927 (0.040)                                                    | 0.980 (0.036)                                                   | 5.11E-11              |
| PWY0-1297                                      | superpathway of purine<br>deoxyribonucleosides<br>degradation    | 1.063 (0.041)                                                    | 1.115 (0.039)                                                   | 4.74E-13              |

|                                               |                                                                   |               |               |             |
|-----------------------------------------------|-------------------------------------------------------------------|---------------|---------------|-------------|
| PWY4FS-8                                      | phosphatidylglycerol<br>biosynthesis II (non-plastidic)           | 1.063 (0.041) | 1.115 (0.039) | 5.78E-13    |
| PWY4FS-7                                      | phosphatidylglycerol<br>biosynthesis I (plastidic)                | 1.005 (0.040) | 1.059 (0.040) | 5.78E-13    |
| PWY0-1298                                     | superpathway of pyrimidine<br>deoxyribonucleosides<br>degradation | 1.031 (0.033) | 1.085 (0.036) | 1.82E-12    |
| ARGSYNBSUB-PWY                                | L-arginine biosynthesis II<br>(acetyl cycle)                      | 0.887 (0.044) | 0.942 (0.034) | 1.09E-12    |
| CALVIN-PWY                                    | Calvin-Benson-Bassham cycle                                       | 0.947 (0.037) | 1.004 (0.041) | 1.10E-10    |
| PWY-6737                                      | starch degradation V                                              | 0.919 (0.030) | 0.978 (0.036) | 4.38E-10    |
| PWY-5347                                      | superpathway of L-methionine<br>biosynthesis (transsulfuration)   | 0.920 (0.041) | 0.979 (0.038) | 4.75E-07    |
| GLYCOCAT-PWY                                  | glycogen degradation I<br>(bacterial)                             | 0.991 (0.032) | 1.053 (0.035) | 2.98E-09    |
| OANTIGEN-PWY                                  | O-antigen building blocks<br>biosynthesis (E. coli)               | 0.991 (0.039) | 1.054 (0.040) | 5.92E-11    |
| PWY-6897                                      | thiamin salvage II                                                | 0.888 (0.038) | 0.952 (0.035) | 1.57E-11    |
| DAPLYSINESYN-PWY                              | L-lysine biosynthesis I                                           | 0.880 (0.037) | 0.945 (0.035) | 2.45E-10    |
| ARGSYN-PWY                                    | L-arginine biosynthesis I (via<br>L-ornithine)                    | 0.883 (0.036) | 0.948 (0.042) | 3.61E-12    |
| PWY-7400                                      | L-arginine biosynthesis IV<br>(archaeobacteria)                   | 0.857 (0.036) | 0.925 (0.036) | 1.01E-11    |
| PWY-7111                                      | pyruvate fermentation to<br>isobutanol (engineered)               | 0.869 (0.036) | 0.938 (0.036) | 4.90E-06    |
| FOLSYN-PWY                                    | superpathway of<br>tetrahydrofolate biosynthesis<br>and salvage   | 0.869 (0.036) | 0.938 (0.036) | 0.000149033 |
| NONOXIPENT-PWY                                | pentose phosphate pathway<br>(non-oxidative branch)               | 1.019 (0.042) | 1.092 (0.039) | 5.21E-05    |
| PWY-6317                                      | galactose degradation I (Leloir<br>pathway)                       | 0.879 (0.038) | 0.954 (0.037) | 0.000804381 |
| <i>Pathways more abundant in STRESS group</i> |                                                                   |               |               |             |
| PWY-7219                                      | adenosine ribonucleotides de<br>novo biosynthesis                 | 0.861 (0.048) | 0.937 (0.050) | 0.001665555 |

|                |                                                                                              |               |               |             |
|----------------|----------------------------------------------------------------------------------------------|---------------|---------------|-------------|
| PWY-6277       | superpathway of 5-<br>aminoimidazole ribonucleotide<br>biosynthesis                          | 0.861 (0.048) | 0.937 (0.050) | 0.00039592  |
| PWY-6122       | 5-aminoimidazole<br>ribonucleotide biosynthesis II                                           | 0.843 (0.045) | 0.925 (0.047) | 0.00039592  |
| PWY0-1319      | CDP-diacylglycerol<br>biosynthesis II                                                        | 0.831 (0.035) | 0.914 (0.038) | 0.000604616 |
| PWY-5667       | CDP-diacylglycerol<br>biosynthesis I                                                         | 0.819 (0.034) | 0.903 (0.034) | 0.000604616 |
| PWY-5103       | L-isoleucine biosynthesis III                                                                | 1.024 (0.039) | 1.113 (0.043) | 0.000503772 |
| PWY-7663       | gondoate biosynthesis<br>(anaerobic)                                                         | 0.805 (0.031) | 0.903 (0.038) | 8.44E-05    |
| PWY-6126       | superpathway of adenosine<br>nucleotides de novo<br>biosynthesis II                          | 0.758 (0.024) | 0.881 (0.041) | 0.000304523 |
| PWY-3001       | superpathway of L-isoleucine<br>biosynthesis I                                               | 0.913 (0.038) | 1.042 (0.043) | 0.000190714 |
| PWY-6163       | chorismate biosynthesis from<br>3-dehydroquinate                                             | 0.620 (0.052) | 0.761 (0.032) | 1.96E-05    |
| SER-GLYSYN-PWY | superpathway of L-serine and<br>glycine biosynthesis I                                       | 0.483 (0.043) | 0.650 (0.066) | 0.000128988 |
| PWY-5973       | cis-vaccenate biosynthesis                                                                   | 0.551 (0.041) | 0.737 (0.055) | 8.90E-06    |
| PWY-5686       | UMP biosynthesis                                                                             | 0.673 (0.034) | 0.871 (0.050) | 6.60E-05    |
| PWY-6386       | UDP-N-acetylmuramoyl-<br>pentapeptide biosynthesis II<br>(lysine-containing)                 | 0.452 (0.044) | 0.690 (0.049) | 1.68E-05    |
| PWY-6387       | UDP-N-acetylmuramoyl-<br>pentapeptide biosynthesis I<br>(meso-diaminopimelate<br>containing) | 0.497 (0.109) | 0.740 (0.046) | 1.17E-05    |
| THRESYN-PWY    | superpathway of L-threonine<br>biosynthesis                                                  | 0.437 (0.052) | 0.682 (0.049) | 4.47E-05    |
| PWY-7221       | guanosine ribonucleotides de<br>novo biosynthesis                                            | 0.460 (0.053) | 0.706 (0.061) | 5.44E-06    |

|                      |                                                                      |               |               |          |
|----------------------|----------------------------------------------------------------------|---------------|---------------|----------|
| PEPTIDOGLYCANSYN-PWY | peptidoglycan biosynthesis I (meso-diaminopimelate containing)       | 0.679 (0.097) | 0.939 (0.051) | 4.71E-06 |
| PWY-6385             | peptidoglycan biosynthesis III (mycobacteria)                        | 0.377 (0.123) | 0.655 (0.047) | 4.45E-06 |
| PWY-7208             | superpathway of pyrimidine nucleobases salvage                       | 0.497 (0.072) | 0.776 (0.069) | 1.04E-05 |
| TRNA-CHARGING-PWY    | tRNA charging                                                        | 0.404 (0.083) | 0.684 (0.069) | 2.06E-06 |
| PWY-7560             | methylerythritol phosphate pathway II                                | 0.594 (0.117) | 0.898 (0.044) | 9.14E-05 |
| NONMEVIPP-PWY        | methylerythritol phosphate pathway I                                 | 0.425 (0.119) | 0.829 (0.026) | 9.14E-05 |
| PWY-5121             | superpathway of geranylgeranyl diphosphate biosynthesis II (via MEP) | 0.303 (0.096) | 0.729 (0.061) | 1.30E-05 |
| PWY-6123             | inosine-5'-phosphate biosynthesis I                                  | 0.299 (0.104) | 0.757 (0.062) | 2.36E-07 |
| HISTSYN-PWY          | L-histidine biosynthesis                                             | 0.448 (0.098) | 0.952 (0.061) | 4.06E-08 |
| ANAGLYCOLYSIS-PWY    | glycolysis III (from glucose)                                        | 0.364 (0.111) | 0.887 (0.069) | 4.55E-07 |
| COA-PWY              | coenzyme A biosynthesis I                                            | 0.731 (0.051) | 1.270 (0.122) | 3.56E-09 |
| 1CMET2-PWY           | N10-formyl-tetrahydrofolate biosynthesis                             | 0.307 (0.126) | 0.869 (0.072) | 9.86E-11 |
| PWY-6121             | 5-aminoimidazole ribonucleotide biosynthesis I                       | 0.301 (0.115) | 0.934 (0.112) | 2.12E-10 |
| RIBOSYN2-PWY         | flavin biosynthesis I (bacteria and plants)                          | 0.807 (0.033) | 0.679 (0.035) | 2.75E-10 |
| PANTO-PWY            | phosphopantothenate biosynthesis I                                   | 0.805 (0.033) | 0.683 (0.035) | 3.12E-09 |
| PANTOSYN-PWY         | pantothenate and coenzyme A biosynthesis I                           | 1.218 (0.072) | 1.104 (0.040) | 6.67E-12 |
| PYRIDNUCSYN-PWY      | NAD biosynthesis I (from aspartate)                                  | 0.553 (0.035) | 0.460 (0.074) | 1.57E-13 |

|                    |                                                                           |               |               |          |
|--------------------|---------------------------------------------------------------------------|---------------|---------------|----------|
| PWY-7539           | 6-hydroxymethyl-dihydropterin diphosphate biosynthesis III<br>(Chlamydia) | 1.334 (0.048) | 1.268 (0.030) | 1.02E-15 |
| ANAEROFrucat-PWY   | homolactic fermentation                                                   | 0.805 (0.038) | 0.743 (0.056) | 1.57E-08 |
| PWY-6147           | 6-hydroxymethyl-dihydropterin diphosphate biosynthesis I                  | 1.008 (0.043) | 1.055 (0.035) | 2.12E-15 |
| PWY-7199           | pyrimidine deoxyribonucleosides salvage                                   | 0.927 (0.040) | 0.980 (0.036) | 1.34E-13 |
| GLUCONEO-PWY       | gluconeogenesis I                                                         | 0.927 (0.040) | 0.980 (0.036) | 3.92E-10 |
| FERMENTATION-PWY   | mixed acid fermentation                                                   | 1.063 (0.041) | 1.115 (0.039) | 1.48E-08 |
| HSERMETANA-PWY     | L-methionine biosynthesis III                                             | 1.063 (0.041) | 1.115 (0.039) | 7.30E-13 |
| PWY-5659           | GDP-mannose biosynthesis                                                  | 1.005 (0.040) | 1.059 (0.040) | 5.49E-12 |
| GLYCOLYSIS         | glycolysis I (from glucose 6-phosphate)                                   | 1.031 (0.033) | 1.085 (0.036) | 1.29E-09 |
| PWY-5484           | glycolysis II (from fructose 6-phosphate)                                 | 0.887 (0.044) | 0.942 (0.034) | 3.86E-11 |
| PWY-7234           | inosine-5'-phosphate biosynthesis III                                     | 0.947 (0.037) | 1.004 (0.041) | 2.03E-15 |
| POLYISOPRENSYN-PWY | polyisoprenoid biosynthesis (E. coli)                                     | 0.919 (0.030) | 0.978 (0.036) | 3.17E-15 |
| PWY-5695           | urate biosynthesis/inosine 5'-phosphate degradation                       | 0.920 (0.041) | 0.979 (0.038) | 4.33E-17 |
| PWY0-162           | superpathway of pyrimidine ribonucleotides de novo biosynthesis           | 0.991 (0.032) | 1.053 (0.035) | 4.78E-16 |
| DTDPRHAMSYN-PWY    | dTDP-L-rhamnose biosynthesis I                                            | 0.991 (0.039) | 1.054 (0.040) | 1.99E-13 |
| FASYN-ELONG-PWY    | fatty acid elongation – saturated                                         | 0.888 (0.038) | 0.952 (0.035) | 2.82E-15 |

**Supplementary table 2:** Short-chain fatty acids (SCFA) concentration in the fecal contents of quail males from the CONTROL-T (n = 15) and STRESS-T (n = 18) groups at Day 6. All data in the table are expressed as mean values  $\pm$  SEM. \*  $p \leq 0.05$ ; #  $p \leq 0.10$ .

| SCFA                              | CONTROL-T          | STRESS-T             |
|-----------------------------------|--------------------|----------------------|
| Acetate ( $\mu\text{mol/g}$ )     | 4.412 $\pm$ 0.757  | 5.294 $\pm$ 0.900    |
| Propionate ( $\mu\text{mol/g}$ )  | 0.121 $\pm$ 0.030  | 0.092 $\pm$ 0.018    |
| Butyrate ( $\mu\text{mol/g}$ )    | 0.075 $\pm$ 0.016  | 0.078 $\pm$ 0.019    |
| Valerate ( $\mu\text{mol/g}$ )    | 0.016 $\pm$ 0.004  | 0.005 $\pm$ 0.002    |
| Caproate ( $\mu\text{mol/g}$ )    | 0.028 $\pm$ 0.005  | 0.016 $\pm$ 0.001 *  |
| Isobutyrate ( $\mu\text{mol/g}$ ) | 0.039 $\pm$ 0.015  | 0.021 $\pm$ 0.005    |
| Isovalerate ( $\mu\text{mol/g}$ ) | 0.016 $\pm$ 0.004  | 0.007 $\pm$ 0.002 *  |
| Isocaproate ( $\mu\text{mol/g}$ ) | 0.015 $\pm$ 0.004  | 0.003 $\pm$ 0.001 *  |
| Acetate (%)                       | 91.558 $\pm$ 2.014 | 94.698 $\pm$ 0.661 # |
| Propionate (%)                    | 2.812 $\pm$ 0.598  | 2.384 $\pm$ 0.488    |
| Butyrate (%)                      | 1.982 $\pm$ 0.405  | 1.589 $\pm$ 0.223    |
| Valerate (%)                      | 0.687 $\pm$ 0.077  | 0.236 $\pm$ 0.035    |
| Caproate (%)                      | 1.202 $\pm$ 0.413  | 0.519 $\pm$ 0.081 *  |
| Isobutyrate (%)                   | 0.701 $\pm$ 0.228  | 0.521 $\pm$ 0.185    |
| Isovalerate (%)                   | 0.552 $\pm$ 0.201  | 0.180 $\pm$ 0.046 *  |
| Isocaproate (%)                   | 0.505 $\pm$ 0.242  | 0.032 $\pm$ 0.020 #  |

**Supplementary table 3:** Table of sequences and number of accession of primers used for the qPCR analysis on brain.

| Gene symbol | Gene description                          | Sequence (5' → 3')              | Accession number                                                                                     |
|-------------|-------------------------------------------|---------------------------------|------------------------------------------------------------------------------------------------------|
| GR          | Glucocorticoid receptor                   | Forward: TCGTACCGGTGTATGGCATT   | XM_015875475.1; XM_015875474.1;<br>XM_015875473.1                                                    |
|             |                                           | Reverse: ACTGAGTCGGTGAAAACACAGA |                                                                                                      |
| MR          | Mineralocorticoid receptor                | F : AGGAGGGGGATATACAGCAAGA      | XM_015861097.1                                                                                       |
|             |                                           | R : TTTATTTTGTGCAACCGGTCAG      |                                                                                                      |
| CRHR1       | Corticotropin releasing factor receptor 1 | F : TCCTATCATTGTGCGCTGGG        | XM_015885972.1 ; XM_015885973.1                                                                      |
|             |                                           | R : CTGATGTGGTTGATGCTCGG        |                                                                                                      |
| BDNF        | Brain derived neurotrophic factor         | F : CCACGGGACTCTTCAAAGCC        | XM_015863456.1; XM_015863460.1;<br>XM_015863458.1; XM_015863461.1;<br>XM_015863457.1; XM_015863459.1 |
|             |                                           | R : AGTCCGCATCCTTGTTCCT         |                                                                                                      |
| PCNA        | Proliferating cell nuclear antigen        | F : TGAGGGTTTCGACACGTACC        | NM_001323225.1                                                                                       |
|             |                                           | R : ACTAGAGCCAACGTATCCGC        |                                                                                                      |
| GAPDH       | Glyceraldehyde 3 phosphate                | F : TCTCTGTTGTTGACCTGACCTG      | XM_015873412.1                                                                                       |
|             |                                           | R : ATGGCTGTCAACATTGAAGTC       |                                                                                                      |
| PGK1        | Phosphoglycerate kinase 1                 | F : CAAGCTCACCTGGACAAGT         | XM_015860450.1 ; XM_015860451.1                                                                      |
|             |                                           | R : GGACGGCTGCCTTGATTCTT        |                                                                                                      |
| SUZ12       | Polycomb repressive complex 2 subunit     | F : CCCGTGAAGAAGCCGAAGAT        | XM_015879612.1                                                                                       |
|             |                                           | R : TTGGTGCTATGAGATTCCGGG       |                                                                                                      |
| ACTB        | β-actin                                   | F : TGACCGCGGTACAAACACAG        | XM_015876619.1                                                                                       |
|             |                                           | R : CATACCAACCATCACACCCTGA      |                                                                                                      |
